# Supplementary material for: Pharmacogenomic identification of small molecules for lineage specific manipulation of subventricular zone germinal activity
Source: PLoS Biol. 2017 Mar 28;15(3):e2000698. doi: 10.1371/journal.pbio.2000698 (PMC5370089; doi:10.1371/journal.pbio.2000698)
Supplement: S1 Data — (XLSX) [file pbio.2000698.s013.xlsx]

## Sheet: Fig 1A
Enrichment analysis report - From GeneGo Metacore
Enrichment by Process Networks					Morphogens Only All Dorsal vs All Lateral
#	Networks	Total	pValue	Min FDR	p-value	FDR	In Data	Network Objects from Active Data				Probeset ID	Entrez Gene	Gene Symbol	Gene Title	RefSeq Transcript ID	p-value(Region OR AGE)	stepup(p-value(Region OR AGE))
1	Inflammation_Jak-STAT Pathway	186	3.02449e-17	1.81469e-15	3.02449e-17	1.81469e-15	29	IL-2, G-CSF receptor, IL-5, CCL5, CCL3L1, IL-17, G-CSF, IL5RA, IL-3, IL-11, IL-2R beta chain, IGF-2, IL-4, PDGF-C, Insulin, IL-6, Eotaxin, PDGF-D, IL-31, IL-9, IL-13, SDF-1, CSF1, IGF-1, Somatotropin, PDGF-B, TNF-alpha, IL-20, IL-21				1422912_at	12159	Bmp4	bone morphogenetic protein 4	NM_007554	4.47393e-14	1.54351e-12
2	Chemotaxis	137	1.01878e-17	1.22253e-15	1.01878e-17	1.22253e-15	26	GRO-3, CCL5, CCL3L1, SLIT2, CXCR3, Galpha(i)-specific peptide GPCRs, IL-1 alpha, CXCL16, MIG, G-protein alpha-i family, IL-4, GRO-2, IL-1 beta, GRO-1, VEGF-A, IP10, Eotaxin, CCL22, Galpha(q)-specific peptide GPCRs, SDF-1, IL-16, Eotaxin-2, CCL7, GCP2, CCL17, MIP-1-beta				1424525_at	225642	Grp	gastrin releasing peptide	NM_175012	2.6572e-12	2.93355e-11
3	Apoptosis_Anti-Apoptosis mediated by external signals via PI3K/AKT	233	5.15467e-12	1.23712e-10	5.15467e-12	1.23712e-10	26	IL-2, FGF19, HGF, PDGF-A, VEGF-C, G-protein alpha-i family, IL-4, NT-3, Insulin, IL-1 beta, NGFR(TNFRSF16), VEGF-A, IL-6, FGF3, FGF7, FGF1, IGF-1, SOS, NGF, PDGF-B, TNF-alpha, FGF10, HGF receptor (Met), FGF4, FGF6, VEGF-B				1448823_at	20315	Cxcl12	chemokine (C-X-C motif) ligand 12	NM_001012477 /// NM_013655 /// NM_021704	6.59574e-13	1.11448e-11
4	Signal transduction_NOTCH signaling	236	6.9337e-12	1.38674e-10	6.9337e-12	1.38674e-10	26	IL-2R alpha chain, Jagged1, PDGF-A, WNT11, TGF-beta 1, WNT7B, PDGF-C, WNT3A, WNT4, VEGF-A, TGF-beta, Epiregulin, PDGF-D, WNT1, DLL4, WNT16, SOS, WNT5B, DLL3, TGF-beta 2, WNT, PDGF-B, WNT6, HIF1A, WNT8B, SOS1				1452114_s_at	16011	Igfbp5	insulin-like growth factor binding protein 5	NM_010518	9.52754e-14	2.39055e-12
5	Proliferation_Positive regulation cell proliferation	221	1.02338e-11	1.75436e-10	1.02338e-11	1.75436e-10	25	G-CSF receptor, IL-5, HGF, G-CSF, CXCR3, Galpha(i)-specific peptide GPCRs, Pleiotrophin (OSF1), IL-3, VEGF-C, IL-11, G-protein alpha-i family, G-protein alpha-i2, VIP, VEGF-A, IP10, FGF7, IL-9, CSF1, IGF-1, SOS, FGF10, HGF receptor (Met), FGF4, SOS1, VEGF-B				1417936_at	20308	Ccl9	chemokine (C-C motif) ligand 9	NM_011338	5.05386e-11	3.98533e-10
6	Development_Blood vessel morphogenesis	228	2.05058e-11	3.07587e-10	2.05058e-11	3.07587e-10	25	Angiopoietin 1, SLIT2, Jagged1, Galpha(i)-specific peptide GPCRs, IL-1 alpha, VEGF-C, Angiopoietin 4, G-protein alpha-i family, G-protein alpha-i2, IL-1 beta, Angiopoietin 3, VEGF-A, Epiregulin, Galpha(q)-specific peptide GPCRs, FGF1, Angiopoietin 2, DLL4, SDF-1, SOS, FGF10, HGF receptor (Met), HIF1A, IGFBP7/8, BMP4, VEGF-B				1418910_at	12162	Bmp7	bone morphogenetic protein 7	NM_007557	9.7708e-06	2.10683e-05
7	Cell adhesion_Platelet-endothelium-leucocyte interactions	174	2.87334e-12	8.62003e-11	2.87334e-12	8.62003e-11	23	G-CSF receptor, CCL5, HGF, G-CSF, IL-18, SREC-II, PDGF-A, TGF-beta 1, PDGF-C, IL-1 beta, SREC-I, IGFBP7, VEGF-A, IL-6, TGF-beta, PDGF-D, PECAM1, TGF-beta 2, PDGF-B, TNF-alpha, HGF receptor (Met), P-selectin, IGFBP7/8				1428664_at	22353	Vip	vasoactive intestinal polypeptide	NM_011702	3.03022e-08	1.22991e-07
8	Cell adhesion_Amyloid proteins	195	3.16812e-11	4.22416e-10	3.16812e-11	4.22416e-10	23	Jagged1, WNT9A, NGFR (ICD), WNT11, WNT9B, NT-3, WNT7B, WNT3A, WNT4, WNT 8A, NGFR(TNFRSF16), WNT1, WNT2B, DLL4, WNT16, WNT5B, DLL3, NGF, TGF-beta 2, WNT, WNT6, WNT8B, NGFR (CTF)				1449351_s_at	54635	Pdgfc	platelet-derived growth factor, C polypeptide	NM_019971	1.03768e-12	1.432e-11
9	Development_Ossification and bone remodeling	157	2.69361e-12	8.62003e-11	2.69361e-12	8.62003e-11	22	GDF5, PTHrP, IBP4, Follistatin, Pleiotrophin (OSF1), GDF11(BMP11), IGF-2, TGF-beta 1, BMP5, BMP7, BMP6, TGF-beta, FGF23, Chordin-like 1, DLL4, CSF1, BMP1, IGF-1, Chordin, IBP, WNT, BMP4				1434413_at	16000	Igf1	insulin-like growth factor 1	NM_001111274 /// NM_001111275 /// NM_001111276 /// NM_010512 /// NM_184052	4.33795e-12	4.43435e-11
10	Proliferation_Negative regulation of cell proliferation	184	6.75919e-11	8.11103e-10	6.75919e-11	8.11103e-10	22	PTHrP, IBP4, CCL3L1, IBP2, Galpha(i)-specific peptide GPCRs, IBP6, IL-1 alpha, GDF11(BMP11), G-protein alpha-i family, IBP5, TGF-beta 1, IL-1 beta, IGFBP7, IL6RA, GRO-1, IL-6, TGF-beta, IBP3, IGF-1, SOS, IBP, SOS1				1455893_at	239405	Rspo2	R-spondin 2 homolog (Xenopus laevis)	NM_172815	2.71617e-09	1.49933e-08
												1456532_at	71785	Pdgfd	platelet-derived growth factor, D polypeptide	NM_027924	7.26948e-07	2.06843e-06
												1423584_at	29817	Igfbp7	insulin-like growth factor binding protein 7	NM_001159518 /// NM_008048	2.65419e-13	5.23255e-12
												1439066_at	11600	Angpt1	angiopoietin 1	NM_009640	1.17919e-08	5.2493e-08
												1433716_x_at	14586	Gfra2	glial cell line derived neurotrophic factor family receptor alpha 2	NM_008115	3.4589e-08	1.34459e-07
												1440270_at	14167	Fgf12	fibroblast growth factor 12	NM_010199 /// NM_183064	2.8717e-12	3.04842e-11
												1442884_at	15234	Hgf	hepatocyte growth factor	NM_010427	2.02576e-07	6.47929e-07
												1455224_at	72713	Angptl1	angiopoietin-like 1	NM_028333	1.90816e-05	3.98979e-05
												1424007_at	14560	Gdf10	growth differentiation factor 10	NM_145741	6.11944e-14	1.68897e-12
												1419710_at	104079	Nxph3	neurexophilin 3	NM_130858	2.93128e-06	7.22351e-06
												1458140_at	20563	Slit2	slit homolog 2 (Drosophila)	NM_178804	1.27387e-06	3.48107e-06
												1450803_at	18205	Ntf3	neurotrophin 3	NM_001164034 /// NM_001164035 /// NM_008742	2.39161e-07	7.41668e-07
												1417391_a_at	16170	Il16	interleukin 16	NM_010551	1.62821e-07	5.41429e-07
												1420249_s_at	20305	Ccl6	chemokine (C-C motif) ligand 6	NM_009139	8.24518e-09	3.9924e-08
												1454159_a_at	16008	Igfbp2	insulin-like growth factor binding protein 2	NM_008342	1.18914e-09	6.98303e-09
												1449319_at	192199	Rspo1	R-spondin homolog (Xenopus laevis)	NM_138683	3.03454e-07	9.10944e-07
												1423250_a_at	21808	Tgfb2	transforming growth factor, beta 2	NM_009367	1.22847e-14	4.84368e-13
												1439766_x_at	22341	Vegfc	vascular endothelial growth factor C	NM_009506	2.62192e-07	8.04055e-07
												1419561_at	20302	Ccl3	chemokine (C-C motif) ligand 3	NM_011337	2.92474e-11	2.52259e-10
												1448914_a_at	12977	Csf1	colony stimulating factor 1 (macrophage)	NM_001113529 /// NM_001113530 /// NM_007778	2.53486e-08	1.06361e-07
												1426221_at	67776	Vwa5a	von Willebrand factor A domain containing 5A	NM_001145957 /// NM_172767	7.43592e-09	3.66485e-08
												1449982_at	16156	Il11	interleukin 11	NM_008350	0.000203868	0.000353884
												1449984_at	20310	Cxcl2	chemokine (C-X-C motif) ligand 2	NM_009140	3.37402e-08	1.33033e-07
												1435714_x_at	239114	Il17d	interleukin 17D	NM_145837	2.16101e-09	1.24258e-08
												1419675_at	18049	Ngf	nerve growth factor	NM_001112698 /// NM_013609	6.87886e-07	1.97767e-06
												1420653_at	21803	Tgfb1	transforming growth factor, beta 1	NM_011577	3.55417e-05	7.00679e-05
												1448152_at	16002	Igf2	insulin-like growth factor 2	NM_001122736 /// NM_001122737 /// NM_010514	1.67519e-13	3.55656e-12
												1423136_at	14164	Fgf1	fibroblast growth factor 1	NM_010197	1.77034e-11	1.68488e-10
												1447858_x_at	16190	Il4ra	interleukin 4 receptor, alpha	NM_001008700 /// NM_010557	1.21722e-05	2.58425e-05
												1456722_at	83453	Chrdl1	chordin-like 1	NM_001114385 /// NM_031258	3.03648e-07	9.10944e-07
												1422300_at	18121	Nog	noggin	NM_008711	0.00624288	0.00776965
												1455607_at	72780	Rspo3	R-spondin 3 homolog (Xenopus laevis)	NM_028351	7.99298e-05	0.000145136
												1426238_at	12153	Bmp1	bone morphogenetic protein 1	NM_009755 /// NR_033241	5.07602e-06	1.15784e-05
												1421017_at	18183	Nrg3	neuregulin 3	NM_001190187 /// NM_001190188 /// NM_008734	6.95921e-06	1.5244e-05
												1449277_at	100039053 /// 100039789 /// 100039848 /// 100039973 /// 100040035 /// 100043918 /// 100	Ccl19 /// Gm12407 /// Gm13309 /// Gm2023 /// Gm2457 /// Gm2564 /// LOC100043918 /// LOC100043921 /// LOC100861618 /// LOC100861647	chemokine (C-C motif) ligand 19 /// predicted gene 12407 /// predicted gene 13309 /// p	NM_011888 /// XM_001472168 /// XM_001473508 /// XM_001473659 /// XM_001473878 /// XM_00	1.66148e-07	5.45915e-07
												1419282_at	100862578 /// 20293	Ccl12 /// LOC100862578	chemokine (C-C motif) ligand 12 /// c-C motif chemokine 12-like	NM_011331 /// XM_003689266	4.54101e-05	8.64358e-05
												1439002_s_at	18775 /// 215028	Prl3d1 /// Prl3d2	prolactin family 3, subfamily d, member 1 /// prolactin family 3, subfamily d, member 1	NM_001205322 /// NM_008864 /// NM_172155	0.000983205	0.00142823
												1418930_at	15945	Cxcl10	chemokine (C-X-C motif) ligand 10	NM_021274	9.77784e-09	4.54859e-08
												1423753_at	68010	Bambi	BMP and activin membrane-bound inhibitor, homolog (Xenopus laevis)	NM_026505	3.94448e-06	9.38514e-06
												1419529_at	83430	Il23a	interleukin 23, alpha subunit p19	NM_031252	0.00110883	0.00159394
												1452416_at	16194	Il6ra	interleukin 6 receptor, alpha	NM_010559	0.000377149	0.000608732
												1422243_at	14178	Fgf7	fibroblast growth factor 7	NM_008008	4.43825e-07	1.30315e-06
												1449236_at	13389	Dll3	delta-like 3 (Drosophila)	NM_007866	3.11897e-10	2.04961e-09
												1449925_at	12766	Cxcr3	chemokine (C-X-C motif) receptor 3	NM_009910	0.000297853	0.000494691
												1450177_at	18053	Ngfr	nerve growth factor receptor (TNFR superfamily, member 16)	NM_033217	2.68216e-05	5.56599e-05
												1421282_at	12160	Bmp5	bone morphogenetic protein 5	NM_007555	4.13276e-06	9.58522e-06
												1417304_at	12667	Chrd	chordin	NM_009893	6.40589e-05	0.000118659
												1440240_at	208990	Npb	neuropeptide B	NM_153288	6.32814e-06	1.39725e-05
												1452165_at	66392	Prl2b1	prolactin family 2, subfamily b, member 1	NM_025532	3.20912e-06	7.76945e-06
												1422176_at	64654	Fgf23	fibroblast growth factor 23	NM_022657	0.0200202	0.0210098
												1441874_x_at	19113	Prl7a1	prolactin family 7, subfamily a, member 1	NM_001164058 /// NM_008930	0.000644186	0.000970474
												1417933_at	16012	Igfbp6	insulin-like growth factor binding protein 6	NM_008344	0.0046431	0.00604479
												1423062_at	16009	Igfbp3	insulin-like growth factor binding protein 3	NM_008343	2.89472e-06	7.19768e-06
												1422228_at	20890	Wnt8a	wingless-related MMTV integration site 8A	NM_009290	0.0226334	0.0235729
												1448669_at	50781	Dkk3	dickkopf homolog 3 (Xenopus laevis)	NM_015814	6.96307e-16	3.84361e-14
												1421686_at	60531	Npvf	neuropeptide VF precursor	NM_021892	0.00963423	0.0111725
												1441316_at	22423	Wnt8b	wingless related MMTV integration site 8b	NM_011720	0.00891419	0.0105142
												1453969_at	73244	Prl8a1	prolactin family 8, subfamily a, member 1	NM_028477	0.0305188	0.0309676
												1451803_a_at	22340	Vegfb	vascular endothelial growth factor B	NM_001185164 /// NM_011697	6.43727e-10	3.94819e-09
												1439373_x_at	22419	Wnt5b	wingless-related MMTV integration site 5B	NM_009525	0.00503365	0.00652248
												1418806_at	12986	Csf3r	colony stimulating factor 3 receptor (granulocyte)	NM_001252651 /// NM_007782 /// NR_045561	5.39363e-08	1.98486e-07
												1421827_at	54485	Dll4	delta-like 4 (Drosophila)	NM_019454	0.00899614	0.0105305
												1420005_s_at	12155	Bmp15	bone morphogenetic protein 15	NM_009757	1.10297e-06	3.07495e-06
												1434458_at	14313	Fst	follistatin	NM_008046	0.000413097	0.000659045
												1456428_at	20309	Cxcl15	chemokine (C-X-C motif) ligand 15	NM_011339	0.000371577	0.000603266
												1419135_at	16994	Ltb	lymphotoxin B	NM_008518	5.16356e-06	1.16815e-05
												1449195_s_at	66102	Cxcl16	chemokine (C-X-C motif) ligand 16	NM_023158	0.0372463	0.0374009
												1449032_at	56635	Prl2a1	prolactin family 2, subfamily a, member 1	NM_019991	0.0100864	0.0115994
												1418376_at	14170	Fgf15	fibroblast growth factor 15	NM_008003	0.00057336	0.000879152
												1449830_at	27372	Prl3c1	prolactin family 3, subfamily c, member 1	NM_001163218 /// NM_013766	0.00651342	0.00793043
												1418718_at	66102	Cxcl16	chemokine (C-X-C motif) ligand 16	NM_023158	0.0306522	0.030989
												1421672_at	16171	Il17a	interleukin 17A	NM_010552	1.25684e-07	4.28257e-07
												1418126_at	20304	Ccl5	chemokine (C-C motif) ligand 5	NM_013653	3.25784e-05	6.57624e-05
												1422826_at	16005	Igfals	insulin-like growth factor binding protein, acid labile subunit	NM_008340	0.000760224	0.00112388
												1422093_at	22416	Wnt3a	wingless-related MMTV integration site 3A	NM_009522	0.000646983	0.000970474
												1418711_at	18590	Pdgfa	platelet derived growth factor, alpha	NM_008808	1.03303e-09	6.19818e-09
												1450334_at	60505	Il21	interleukin 21	NM_021782	0.018236	0.0196607
												1415931_at	16002	Igf2	insulin-like growth factor 2	NM_001122736 /// NM_001122737 /// NM_010514	0.0301375	0.0308072
												1436545_at	207521	Dtx4	deltex 4 homolog (Drosophila)	NM_172442	4.25688e-09	2.30372e-08
												1421404_at	20309	Cxcl15	chemokine (C-X-C motif) ligand 15	NM_011339	0.00612477	0.00771889
												1459363_at	20239	Atxn2	ataxin 2	NM_009125	1.12411e-10	7.95524e-10
												1418880_at	14587	Gfra3	glial cell line derived neurotrophic factor family receptor alpha 3	NM_010280	0.00871382	0.0103219
												1423377_at	75426	Igfbpl1	insulin-like growth factor binding protein-like 1	NM_018741	3.28812e-05	6.57624e-05
												1422941_at	93735	Wnt16	wingless-related MMTV integration site 16	NM_053116	7.8808e-06	1.71268e-05
												1417925_at	20299	Ccl22	chemokine (C-C motif) ligand 22	NM_009137	0.0198639	0.0209701
												1426507_at	54450	Il1f5	interleukin 1 family, member 5 (delta)	NM_001146087 /// NM_001146088 /// NM_019451	4.22587e-05	8.21366e-05
												1419607_at	21926	Tnf	tumor necrosis factor	NM_013693	0.00389602	0.00519469
												1419708_at	22420	Wnt6	wingless-related MMTV integration site 6	NM_009526	3.99968e-06	9.43514e-06
												1450488_at	56221	Ccl24	chemokine (C-C motif) ligand 24	NM_019577	5.45435e-07	1.58463e-06
												1450282_at	14175	Fgf4	fibroblast growth factor 4	NM_010202	0.000512752	0.000808683
												1455427_at	11602	Angpt4	angiopoietin 4	NM_009641	0.00429868	0.00570402
												1427582_at	14177	Fgf6	fibroblast growth factor 6	NM_010204	0.00632252	0.00779025
												1425377_at	22408	Wnt1	wingless-related MMTV integration site 1	NM_021279	9.79929e-05	0.000174491
												1422324_a_at	19227	Pthlh	parathyroid hormone-like peptide	NM_008970	0.000524423	0.000822391
												1426399_at	246228	Vwa1	von Willebrand factor A domain containing 1	NM_147776	3.17493e-08	1.26997e-07
												1421620_at	16192	Il5ra	interleukin 5 receptor, alpha	NM_008370	0.012821	0.0143263
												1421681_at	83961	Nrg4	neuregulin 4	NM_032002	0.0165962	0.0181049
												1421688_a_at	20290	Ccl1	chemokine (C-C motif) ligand 1	NM_011329	0.0117487	0.0132353
												1421407_at	14064	F2rl2	coagulation factor II (thrombin) receptor-like 2	NM_010170	0.00626948	0.00776965
												1422347_at	18169	Npy6r	neuropeptide Y receptor Y6	NM_010935	0.00247269	0.00346428
												1430001_at	76399	Il31	interleukin 31	NM_029594	0.000885948	0.00129377
												1447907_x_at	56846	Necab3	N-terminal EF-hand calcium binding protein 3	NM_021546	3.11003e-06	7.59618e-06
												1417905_at	19114	Prl7a2	prolactin family 7, subfamily a, member 2	NM_011168	0.00539224	0.00692213
												1450565_at	16198	Il9	interleukin 9	NM_008373	0.00646928	0.00793043
												1448259_at	14314	Fstl1	follistatin-like 1	NM_008047	3.16633e-11	2.6482e-10
												1421287_a_at	18613	Pecam1	platelet/endothelial cell adhesion molecule 1	NM_001032378 /// NM_008816	0.00910741	0.0106061
												1450550_at	16191	Il5	interleukin 5	NM_010558	0.000572792	0.000879152
												1438148_at	330122	Cxcl3	chemokine (C-X-C motif) ligand 3	NM_203320	4.3014e-05	8.302e-05
												1449990_at	16183	Il2	interleukin 2	NM_008366	0.00126322	0.00179716
												1427723_at	14561	Gdf11	growth differentiation factor 11	NM_010272	0.0262161	0.0268983
												1442140_at	329278	Tnn	tenascin N	NM_177839	0.0142892	0.0158386
												1425958_at	215257	Il1f9	interleukin 1 family, member 9	NM_153511	0.0196785	0.0208895
												1438696_at	13616	Edn3	endothelin 3	NM_007903	0.000495918	0.000786629
												1450759_at	12161	Bmp6	bone morphogenetic protein 6	NM_007556	7.36729e-11	5.64826e-10
												1419426_s_at	100041504 /// 100041593 /// 100042493 /// 100504239 /// 100504346 /// 100504362 /// 100	Ccl21a /// Ccl21b /// Ccl21c /// Gm10591 /// Gm13304 /// Gm1987 /// LOC100041504 /// LOC100041593 /// LOC100862177	chemokine (C-C motif) ligand 21A (serine) /// chemokine (C-C motif) ligand 21B (leucine	NM_001193666 /// NM_001193667 /// NM_001193668 /// NM_001270360 /// NM_011124 /// NM_01	9.88825e-09	4.54859e-08
												1416211_a_at	19242	Ptn	pleiotrophin	NM_008973	1.19332e-10	8.03308e-10
												1458175_at	100689	Spon2	spondin 2, extracellular matrix protein	NM_133903	3.08544e-05	6.30801e-05
												1451478_at	654812	Angptl7	angiopoietin-like 7	NM_001039554	0.000392032	0.000629075
												1421473_at	16175	Il1a	interleukin 1 alpha	NM_010554	5.54331e-09	2.83325e-08
												1425447_at	234130	Dkk4	dickkopf homolog 4 (Xenopus laevis)	NM_145592	0.000174807	0.000307304
												1453250_at	70853	Vwa3b	von Willebrand factor A domain containing 3B	NM_027580 /// NM_177334 /// XM_003084438 /// XM_003086154	4.70776e-08	1.75587e-07
												1420802_at	16163	Il13	interleukin 13	NM_008355	0.000670629	0.00100051
												1420692_at	16184	Il2ra	interleukin 2 receptor, alpha chain	NM_008367	0.00459344	0.00600848
												1419712_at	16188	Il3ra	interleukin 3 receptor, alpha chain	NM_008369	0.0183371	0.0196928
												1451959_a_at	22339	Vegfa	vascular endothelial growth factor A	NM_001025250 /// NM_001025257 /// NM_001110266 /// NM_001110267 /// NM_001110268 /// NM	0.000876395	0.00128662
												1426181_a_at	93672	Il24	interleukin 24	NM_053095	0.0147327	0.0162649
												1449864_at	16189	Il4	interleukin 4	NM_021283 /// NR_027491	0.00627765	0.00776965
												1421423_at	67505	Prl7c1	prolactin family 7, subfamily c, member 1	NM_026206	0.0061973	0.00776965
												1422003_at	12145	Cxcr5	chemokine (C-X-C motif) receptor 5	NM_007551	0.00112738	0.00161221
												1419684_at	100503254 /// 20307	Ccl8 /// LOC100503254	chemokine (C-C motif) ligand 8 /// c-C motif chemokine 8-like	NM_021443 /// XM_003085741	0.0043972	0.00580683
												1421228_at	20306	Ccl7	chemokine (C-C motif) ligand 7	NM_013654	0.00744119	0.00892943
												1416895_at	13636	Efna1	ephrin A1	NM_001162425 /// NM_010107	0.0113765	0.0129215
												1448831_at	11601	Angpt2	angiopoietin 2	NM_007426	2.27949e-06	5.82536e-06
												1450566_at	16187	Il3	interleukin 3	NM_010556	0.0120908	0.0135653
												1419427_at	12985	Csf3	colony stimulating factor 3 (granulocyte)	NM_009971	0.0199064	0.0209701
												1421578_at	20303	Ccl4	chemokine (C-C motif) ligand 4	NM_013652	7.42683e-07	2.09164e-06
												1435124_at	328643	Vwa5b2	von Willebrand factor A domain containing 5B2	NM_001144953 /// NM_182636 /// NM_198629	4.10422e-06	9.58522e-06
												1449399_a_at	16176	Il1b	interleukin 1 beta	NM_008361	2.61544e-08	1.07741e-07
												1422447_at	16333	Ins1	insulin I	NM_008386	0.00313954	0.00431101
												1431693_a_at	56069	Il17b	interleukin 17B	NM_019508	0.0257292	0.0264972
												1418652_at	17329	Cxcl9	chemokine (C-X-C motif) ligand 9	NM_008599	5.80692e-05	0.000108485
												1419431_at	13874	Ereg	epiregulin	NM_007950	0.0020522	0.00288983
												1419139_at	14563	Gdf5	growth differentiation factor 5	NM_008109	0.00520624	0.00671459
												1429753_at	104080	Nxph4	neurexophilin 4	NM_183297	0.000299324	0.000494691
												1460613_x_at	14599	Gh	growth hormone	NM_008117	0.000761468	0.00112388
												1449908_at	14607	Gip	gastric inhibitory polypeptide	NM_008119	0.0028227	0.0039149
												1423757_x_at	16010	Igfbp4	insulin-like growth factor binding protein 4	NM_010517	8.7686e-11	6.36877e-10
												1420512_at	56811	Dkk2	dickkopf homolog 2 (Xenopus laevis)	NM_020265	0.000209147	0.000360779
												1421523_at	14171	Fgf17	fibroblast growth factor 17	NM_008004	0.000185254	0.000323608
												1419413_at	20295	Ccl17	chemokine (C-C motif) ligand 17	NM_011332	0.00457166	0.00600847
												1425357_a_at	23892	Grem1	gremlin 1	NM_011824	0.00719168	0.0086677
												1417789_at	20292	Ccl11	chemokine (C-C motif) ligand 11	NM_011330	0.0243451	0.0251657
												1418418_a_at	19112	Prl8a6	prolactin family 8, subfamily a, member 6	NM_011167	0.0176911	0.019148
												1420752_at	80904	Dtx3	deltex 3 homolog (Drosophila)	NM_030714	2.54705e-12	2.92911e-11
												1422446_x_at	16334	Ins2	insulin II	NM_001185083 /// NM_001185084 /// NM_008387	0.000247782	0.000419557
												1448183_a_at	15251	Hif1a	hypoxia inducible factor 1, alpha subunit	NM_010431	7.37094e-08	2.64205e-07
												1418206_at	64136	Sdf2l1	stromal cell-derived factor 2-like 1	NM_022324	0.0227354	0.0235901
												1425715_at	69677	Il1f8	interleukin 1 family, member 8	NM_027163	0.0139139	0.0154848
												1434070_at	16449	Jag1	jagged 1	NM_013822	2.42287e-11	2.15977e-10
												1422803_at	83554	Fstl3	follistatin-like 3	NM_031380	0.000616602	0.000935067
												1420746_at	67000	Prl3a1	prolactin family 3, subfamily a, member 1	NM_025896	0.00383022	0.00513175
												1417932_at	16173	Il18	interleukin 18	NM_008360	2.06586e-07	6.47929e-07
												1434647_at	268780	Egflam	EGF-like, fibronectin type III and laminin G domains	NM_178748	2.02926e-06	5.23435e-06
												1450414_at	18591	Pdgfb	platelet derived growth factor, B polypeptide	NM_011057	2.63587e-06	6.61364e-06
												1436978_at	216795	Wnt9a	wingless-type MMTV integration site 9A	NM_139298	3.68819e-06	8.85166e-06
												1420892_at	22422	Wnt7b	wingless-related MMTV integration site 7B	NM_001163633 /// NM_001163634 /// NM_009528	5.81731e-05	0.000108485
												1417787_at	50722	Dkkl1	dickkopf-like 1	NM_015789	0.00828362	0.00989731
												1421465_at	22414	Wnt2b	wingless related MMTV integration site 2b	NM_009520	0.0225142	0.0235376
												1450772_at	22411	Wnt11	wingless-related MMTV integration site 11	NM_009519	0.0101533	0.0116278
												1455882_x_at	319922	Vwc2	von Willebrand factor C domain containing 2	NM_177033	3.04705e-05	6.27601e-05
												1421608_at	58181	Il20	interleukin 20	NM_021380	0.016866	0.0183268
												1422923_at	14174	Fgf3	fibroblast growth factor 3	NM_008007	3.49564e-05	6.94098e-05
												1449508_at	50931	Il27ra	interleukin 27 receptor, alpha	NM_016671	0.000306964	0.000504298
												1452272_a_at	11692	Gfer	growth factor, erv1 (S. cerevisiae)-like (augmenter of liver regeneration)	NM_023040 /// NM_212443	0.000240538	0.000409805
												1448759_at	16185	Il2rb	interleukin 2 receptor, beta chain	NM_008368	7.36723e-05	0.000135557
												1448980_at	58991	Ghrl	ghrelin	NM_021488	0.00560901	0.00716707
												1439794_at	57764	Ntn4	netrin 4	NM_021320	5.57537e-10	3.49728e-09
												1420690_at	14165	Fgf10	fibroblast growth factor 10	NM_008002	0.0186892	0.0199931
												1419728_at	20311	Cxcl5	chemokine (C-X-C motif) ligand 5	NM_009141	0.0115813	0.0131002
												1450782_at	22417	Wnt4	wingless-related MMTV integration site 4	NM_009523	4.87312e-11	3.95583e-10
												1443197_at	22412	Wnt9b	wingless-type MMTV integration site 9B	NM_011719	0.0159681	0.0175585
												1459052_at	53417	Hif3a	hypoxia inducible factor 3, alpha subunit	NM_001162950 /// NM_016868	0.0108103	0.0123291

## Sheet: Fig1B
Enrichment analysis report - From GeneGo Metacore
Enrichment by Process Networks					Morphogens Only All Dorsal vs All Lateral
#	Networks	Total	pValue	Min FDR	p-value	FDR	In Data	Network Objects from Active Data				Probeset ID	Entrez Gene	Gene Symbol	Gene Title	RefSeq Transcript ID	p-value(Region OR AGE)	stepup(p-value(Region OR AGE))
1	Signal transduction_NOTCH signaling	236	1.2892e-06	4.8345e-05	1.2892e-06	4.8345e-05	12	EGF, TGF-beta, DTX1, WNT10B, WNT5A, WNT2, Neuregulin 1, WNT, TGF-beta 3, TGF-alpha, WNT7A, Jagged2				1421720_a_at	74198	Dtx2	deltex 2 homolog (Drosophila)	NM_001256096 /// NM_001256097 /// NM_001256098 /// NM_023742	0.00274343	0.00382418
2	Cell adhesion_Attractive and repulsive receptors	175	4.62988e-07	3.47241e-05	4.62988e-07	3.47241e-05	11	Ephrin-A, Ephrin-B2 (CTF2), Ephrin-B3, Netrin-1, Ephrin-A5, Ephrin-A2, Ephrin-A3, SLIT1, Ephrin-B2, Ephrin-B, SLIT3				1425882_at	12165	Gdf2	growth differentiation factor 2	NM_019506	0.00843353	0.010033
3	Development_Neurogenesis_Axonal guidance	230	6.81095e-06	0.000170274	6.81095e-06	0.000170274	11	Ephrin-A, Ephrin-B3, Netrin-1, Ephrin-A5, Ephrin-A2, Ephrin-A3, ENC1, SLIT1, Ephrin-B2, Ephrin-B, SLIT3				1455090_at	26360	Angptl2	angiopoietin-like 2	NM_011923	1.23642e-05	2.60498e-05
4	Development_Regulation of angiogenesis	223	3.26397e-05	0.000489595	3.26397e-05	0.000489595	10	Ephrin-A, Ephrin-A5, PGAR, Galpha(q)-specific peptide GPCRs, IL-15, Ephrin-B2, Endothelin-1, Ephrin-B, WT1, CXCR4				1448120_at	14566	Gdf9	growth differentiation factor 9	NM_008110	0.003674	0.00497071
5	Development_Neurogenesis in general	192	5.95962e-05	0.000744953	5.95962e-05	0.000744953	9	GFRalpha4, NRTN, WNT10B, WNT5A, GFRalpha1, WNT2, WNT, GDNF, WNT7A				1451924_a_at	13614	Edn1	endothelin 1	NM_010104	0.00318986	0.00435842
6	Reproduction_Feeding and Neurohormone signaling	211	0.000666234	0.00555195	0.000666234	0.00555195	8	Substance P, TAC3, TGF-beta, VGF, Substance P extracellular region, Galpha(q)-specific peptide GPCRs, GHR, Endothelin-1				1428842_a_at	12070	Ngfrap1	nerve growth factor receptor (TNFRSF16) associated protein 1	NM_001110233 /// NM_001110234 /// NM_009750	0.000210687	0.000361178
7	Reproduction_Male sex differentiation	246	0.00179731	0.0103691	0.00179731	0.00103691	8	FGF9, BMP2, EGF, EWS/WT1 fusion protein, TGF-beta 3, WT1, TGF-alpha, Jagged2				1449269_at	14067	F5	coagulation factor V	NM_007976	0.00606914	0.00768387
8	Chemotaxis	137	0.000247681	0.00265373	0.000247681	0.00265373	7	CCL28, CX3CL1, Galpha(q)-specific peptide GPCRs, CXCL14, CXCL13, CCL25, GRO-2				1431920_a_at	76527	Il34	interleukin 34	NM_001135100 /// NM_029646	0.00900433	0.0105305
9	Signal transduction_Neuropeptide signaling pathways	155	0.000525351	0.00492517	0.000525351	0.00492517	7	NPY, Substance P, TAC3, Substance P extracellular region, Galpha(q)-specific peptide GPCRs, Proenkephalin-B, Enkephalin A				1451535_at	218624	Il31ra	interleukin 31 receptor A	NM_139299	0.0161544	0.0176929
10	Development_Neurogenesis_Synaptogenesis	180	0.00127272	0.00867762	0.00127272	0.00867762	7	Ephrin-B3, Neuregulin 2, Neuregulin 1, Ephrin-B2, Ephrin-B, WNT, WNT7A				1451957_at	215274	Il1f10	interleukin 1 family, member 10	NM_153077	0.00652249	0.00793043
												1455577_at	56838	Ccl28	chemokine (C-C motif) ligand 28	NM_020279	0.000555974	0.000866943
												1420795_at	14180	Fgf9	fibroblast growth factor 9	NM_013518	5.7568e-06	1.28135e-05
												1426091_a_at	22410	Wnt10b	wingless related MMTV integration site 10b	NM_011718	0.00996371	0.0115062
												1441855_x_at	14825	Cxcl1	chemokine (C-X-C motif) ligand 1	NM_008176	0.0303534	0.0309134
												1425425_a_at	24117	Wif1	Wnt inhibitory factor 1	NM_011915	0.0383587	0.0383587
												1426431_at	16450	Jag2	jagged 2	NM_010588	1.76493e-06	4.68385e-06
												1456524_at	211323	Nrg1	neuregulin 1	NM_178591	0.01917	0.0204283
												1417455_at	21809	Tgfb3	transforming growth factor, beta 3	NM_009368	1.79304e-07	5.82211e-07
												1421677_at	80857	Fgf20	fibroblast growth factor 20	NM_030610	0.0372654	0.0374009
												1456129_at	233813	Vwa3a	von Willebrand factor A domain containing 3A	NM_177697	0.000559275	0.00086719
												1417408_at	14066	F3	coagulation factor III	NM_010171	2.1857e-08	9.42583e-08
												1450342_at	12164	Bmp8b	bone morphogenetic protein 8b	NM_007559	0.00295108	0.00407249
												1448710_at	12767	Cxcr4	chemokine (C-X-C motif) receptor 4	NM_009911	0.00164312	0.00232565
												1418219_at	16168	Il15	interleukin 15	NM_001254747 /// NM_008357	2.0571e-07	6.47929e-07
												1451610_at	232983	Cxcl17	chemokine (C-X-C motif) ligand 17	NM_153576	0.00103213	0.00149145
												1437964_at	18232	Nxph2	neurexophilin 2	NM_008752	1.36553e-06	3.65936e-06
												1423635_at	12156	Bmp2	bone morphogenetic protein 2	NM_007553	0.000285359	0.000477328
												1436718_at	18231	Nxph1	neurexophilin 1	NM_008751	6.93699e-08	2.51922e-07
												1449545_at	14172	Fgf18	fibroblast growth factor 18	NM_008005	5.25079e-09	2.73437e-08
												1416857_at	20316	Sdf2	stromal cell derived factor 2	NM_009143	8.26784e-05	0.000149145
												1458277_at	20300	Ccl25	chemokine (C-C motif) ligand 25	NM_009138 /// NR_033527	7.41978e-05	0.00013562
												1417962_s_at	14600	Ghr	growth hormone receptor	NM_001048147 /// NM_001048178 /// NM_010284	1.17796e-10	8.03308e-10
												1449281_at	18188	Nrtn	neurturin	NM_008738	0.000327845	0.000535416
												1419411_at	21334	Tac2	tachykinin 2	NM_001199971 /// NM_009312	4.40488e-05	8.44269e-05
												1418093_a_at	13645	Egf	epidermal growth factor	NM_010113	2.54342e-08	1.06361e-07
												1425995_s_at	22431	Wt1	Wilms tumor 1 homolog	NM_144783	0.000278805	0.000469208
												1429761_at	104001	Rtn1	reticulon 1	NM_001007596 /// NM_153457	1.02906e-12	1.432e-11
												1450440_at	14585	Gfra1	glial cell line derived neurotrophic factor family receptor alpha 1	NM_010279	9.14798e-09	4.35318e-08
												1434216_a_at	110959	Nudt19	nudix (nucleoside diphosphate linked moiety X)-type motif 19	NM_033080	2.42583e-11	2.15977e-10
												1428576_at	319594	Hif1an	hypoxia-inducible factor 1, alpha subunit inhibitor	NM_176958	8.87637e-05	0.000159083
												1420360_at	13380	Dkk1	dickkopf homolog 1 (Xenopus laevis)	NM_010051	0.00373691	0.00503116
												1452296_at	20564	Slit3	slit homolog 3 (Drosophila)	NM_011412	0.000585817	0.00089329
												1429085_at	22344	Vezf1	vascular endothelial zinc finger 1	NM_016686	1.89375e-12	2.3758e-11
												1457283_at	100042150	Nrg2	neuregulin 2	NM_001167891	0.00671103	0.00812388
												1418497_at	14168	Fgf13	fibroblast growth factor 13	NM_010200	9.56591e-08	3.34201e-07
												1418108_at	170799	Rtkn2	rhotekin 2	NM_001081346 /// NM_133244	3.28668e-05	6.57624e-05
												1425822_a_at	14357	Dtx1	deltex 1 homolog (Drosophila)	NM_008052	1.72091e-12	2.26177e-11
												1435482_at	98970	Fibcd1	fibrinogen C domain containing 1	NM_178887	1.96012e-06	5.15232e-06
												1439959_at	14166	Fgf11	fibroblast growth factor 11	NM_010198	2.31724e-06	5.86751e-06
												1421943_at	21802	Tgfa	transforming growth factor alpha	NM_031199	2.15063e-16	1.97858e-14
												1423085_at	13643	Efnb3	ephrin B3	NM_007911	3.34004e-10	2.14384e-09
												1425277_at	20562	Slit1	slit homolog 1 (Drosophila)	NM_015748	9.84928e-06	2.10729e-05
												1450835_a_at	14588	Gfra4	glial cell line derived neurotrophic factor family receptor alpha 4	NM_001136063 /// NM_020014	2.02399e-06	5.23435e-06
												1455344_at	13638	Efna3	ephrin A3	NM_010108	3.56634e-08	1.3671e-07
												1444606_at	13637	Efna2	ephrin A2	NM_007909	3.85933e-05	7.55443e-05
												1416200_at	77125	Il33	interleukin 33	NM_001164724 /// NM_133775	0.000122103	0.000216028
												1436866_at	13640	Efna5	ephrin A5	NM_010109 /// NM_207654	4.70602e-05	8.89631e-05
												1418492_at	23893	Grem2	gremlin 2 homolog, cysteine knot superfamily (Xenopus laevis)	NM_011825	1.02971e-08	4.65902e-08
												1415821_at	20320	Nptn	neuroplastin	NM_009145	1.59605e-07	5.37207e-07
												1440413_at	320460	Vwc2l	von Willebrand factor C domain-containing protein 2-like	NM_177164	1.90166e-08	8.33108e-08
												1423367_at	22421	Wnt7a	wingless-related MMTV integration site 7A	NM_009527	8.35964e-08	2.95803e-07
												1419080_at	14573	Gdnf	glial cell line derived neurotrophic factor	NM_010275	1.36563e-06	3.65936e-06
												1416266_at	18610	Pdyn	prodynorphin	NM_018863	2.54277e-09	1.43225e-08
												1415803_at	20312	Cx3cl1	chemokine (C-X3-C motif) ligand 1	NM_009142	9.96891e-15	4.5857e-13
												1437673_at	22418	Wnt5a	wingless-related MMTV integration site 5A	NM_001256224 /// NM_009524	1.21165e-07	4.18019e-07
												1419639_at	13642	Efnb2	ephrin B2	NM_010111	7.59798e-11	5.66768e-10
												1430375_a_at	100039863 /// 100039939 /// 100040048 /// 100861978 /// 20301	Ccl27a /// Ccl27b /// Gm13306 /// Gm2506 /// LOC100861978	chemokine (C-C motif) ligand 27A /// chemokine (C-C motif) ligand 27b /// predicted gen	NM_001048179 /// NM_001164044 /// NM_001164045 /// NM_001164046 /// NM_001199959 /// NM	6.86456e-13	1.11448e-11
												1418457_at	57266	Cxcl14	chemokine (C-X-C motif) ligand 14	NM_019568	5.25141e-13	9.66259e-12
												1436094_at	381677	Vgf	VGF nerve growth factor inducible	NM_001039385	2.49656e-12	2.92911e-11
												1417851_at	55985	Cxcl13	chemokine (C-X-C motif) ligand 13	NM_018866	4.10371e-07	1.21788e-06
												1449425_at	22413	Wnt2	wingless-related MMTV integration site 2	NM_023653	7.01237e-09	3.51893e-08
												1419127_at	109648	Npy	neuropeptide Y	NM_023456	5.29556e-14	1.62397e-12
												1454974_at	18208	Ntn1	netrin 1	NM_008744	4.35394e-08	1.64615e-07
												1435747_at	14169	Fgf14	fibroblast growth factor 14	NM_010201 /// NM_207667	5.59949e-06	1.25647e-05
												1417625_s_at	12778	Cxcr7	chemokine (C-X-C motif) receptor 7	NM_007722	4.94178e-09	2.62294e-08
												1416783_at	21333	Tac1	tachykinin 1	NM_009311	3.95645e-16	2.72995e-14
												1427038_at	18619	Penk	preproenkephalin	NM_001002927	9.72372e-17	1.34187e-14

## Sheet: Fig 1C
Enriched in the Niche
Column ID	Entrez Gene	Gene Symbol	Gene Title	RefSeq Transcript ID	p-value(Age - Cell Type - Region)	stepup(p-value(P11 LatSVZ and P11 dSVZ and P4 LatSVZ and P4 dSVZ and P8 LatSVZ and P8 dSVZ vs. P4 LatTAPs and P4 dNSCs and P4 dTAPs and P4 latNSCs))	Fold-Change(P11 LatSVZ and P11 dSVZ and P4 LatSVZ and P4 dSVZ and P8 LatSVZ and P8 dSVZ vs. P4 LatTAPs and P4 dNSCs and P4 dTAPs and P4 latNSCs)		Anti log expression values + SD	P11 Dorsal SVZ	P11 Dorsal SVZ SD	P8 Dorsal SVZ	P8 Dorsal SVZ SD	P4 Dorsal SVZ	P4 Dorsal SVZ SD	P11 Lateral SVZ	P11 Lateral SVZ SD	P8 Lateral SVZ	P8 Lateral SVZ SD	P4 Lateral SVZ	P4 Lateral SVZ SD	P4 Dorsal NSCs	P4 Dorsal NSCs SD	P4 Dorsal TAPs	P4 Dorsal TAPs SD	P4 Lateral NSCs	P4 Lateral NSCs SD	P4 Lateral TAPs	P4 Lateral TAPs SD
1435386_at	22371	Vwf	Von Willebrand factor homolog	NM_011708 /// XM_006505917 /// XM_006505918	1.76342e-14	1.16808e-14	11.2658			197.194	11.5888	252.174	51.5546	487.489	45.2495	151.395	15.5868	126.322	6.60922	236.155	10.9128	33.5523	4.92166	27.4799	1.69295	14.5647	0.183708	10.5679	0.863112
1448152_at	16002	Igf2	insulin-like growth factor 2	NM_001122736 /// NM_001122737 /// NM_010514 /// XM_006508486 /// XM_006508487	1.67519e-13	5.13299e-14	9.45433			619.961	4.00216	927.353	2.63853	2019.85	267.035	789.944	30.3745	479.408	26.5288	774.121	30.9893	101.462	11.897	81.1699	10.5495	96.727	12.6253	78.1476	13.323
1415803_at	20312	Cx3cl1	chemokine (C-X3-C motif) ligand 1	NM_009142	9.96891e-15	1.01173e-14	9.38247			473.053	44.0259	850.809	54.2167	190.22	10.4037	1346.22	34.1296	967.094	52.8667	409.052	9.09448	59.8419	5.61643	72.8108	3.05168	57.838	0.846079	61.361	11.2934
1436094_at	381677	Vgf	VGF nerve growth factor inducible	NM_001039385 /// XM_006504434 /// XM_006504435 /// XM_006504436 /// XM_006504437 /// XM	2.49656e-12	4.85216e-13	7.9811			279.441	5.35067	419.819	90.1919	139.776	12.1849	956.893	33.3662	663.371	152.636	388.038	21.2668	53.8858	5.76677	48.1035	7.09737	44.969	6.86236	53.684	5.16481
1417399_at	14456	Gas6	growth arrest specific 6	NM_019521	8.40049e-13	1.89276e-13	7.47289			1027.28	72.3668	897.465	42.1179	574.598	129.683	1118.54	151.296	959.01	9.56894	498.005	88.3527	151.093	21.2922	92.2083	1.37694	149.982	2.93409	65.5901	5.63412
1448669_at	50781	Dkk3	dickkopf homolog 3 (Xenopus laevis)	NM_015814 /// XM_006508013 /// XM_006508014	6.96307e-16	4.50215e-15	6.63005			2002.66	126.31	1817.96	97.5138	1951.4	31.9341	1594.49	116.127	1470.71	142.333	1211.32	61.0987	680.183	28.0385	94.532	9.50893	482.044	58.192	124.244	2.62726
1424528_at	68567	Cgref1	cell growth regulator with EF hand domain 1	NM_001160149 /// NM_026770	2.1159e-13	4.87796e-14	6.39834			211.984	9.33048	242.18	19.9456	106.666	18.4114	236.292	26.0559	203.001	4.85117	209.039	16.6201	33.2037	2.25744	30.7206	3.61296	28.9688	1.07024	29.1277	1.9954
1450782_at	22417	Wnt4	wingless-type MMTV integration site family, member 4	NM_009523	4.87312e-11	2.45406e-12	5.6424			376.159	36.3275	398.117	33.5386	214.103	48.2283	431.227	23.2844	347.799	14.0315	264.183	22.6775	58.0507	5.38729	68.1343	6.36447	48.5445	7.51109	60.9032	10.9892
1418492_at	23893	Grem2	gremlin 2 homolog, cysteine knot superfamily (Xenopus laevis)	NM_011825 /// XM_006496826 /// XM_006496827	1.02971e-08	2.43505e-10	5.15151			142.931	55.6591	154.124	4.60148	80.382	17.0953	184.048	1.35914	196.613	0.572356	128.81	1.48703	25.1436	3.33001	25.2419	4.68942	29.5328	3.40388	31.2236	7.64234
1460187_at	20377	Sfrp1	secreted frizzled-related protein 1	NM_013834 /// XM_006509042	3.77061e-11	2.17279e-11	5.11402			245.057	86.3473	272.987	75.7013	510.711	28.1221	250.167	1.82894	248.806	5.18221	299.51	25.8928	185.895	13.2153	31.9845	2.38022	85.1028	8.67565	20.8939	2.8692
1450759_at	12161	Bmp6	bone morphogenetic protein 6	NM_007556	7.36729e-11	8.49007e-12	5.01368			253.448	21.3511	214.014	48.1877	281.638	25.9677	231.427	24.1021	193.355	9.19814	169.652	2.81975	70.641	5.74707	25.6763	4.30384	69.9788	5.24012	30.0227	5.56809
1440413_at	320460	Vwc2l	von Willebrand factor C domain-containing protein 2-like	NM_177164 /// XM_006496063 /// XM_006496064 /// XM_006496065 /// XR_373257	1.90166e-08	3.86363e-10	4.61603			48.3846	19.4041	69.7748	15.5101	41.4481	9.37341	82.7383	1.01441	81.5974	3.61503	71.8676	15.2405	11.8646	2.58593	14.9876	0.828069	12.5964	0.205458	15.8508	1.87156
1455344_at	13638	Efna3	ephrin A3	NM_010108 /// XM_006500988 /// XM_006500989	3.56634e-08	1.12554e-09	4.33139			166.787	25.5234	175.269	46.4306	115.611	7.82502	301.412	0.621049	321.069	82.0632	274.624	32.1614	63.7355	7.47668	54.838	4.86967	46.1746	4.91885	36.2338	14.0513
1423136_at	14164	Fgf1	fibroblast growth factor 1	NM_010197 /// XM_006525641 /// XM_006525642 /// XM_006525643 /// XM_006525644 /// XM_00	1.77034e-11	3.53432e-12	3.98754			234.357	21.1669	198.62	23.4952	99.2557	0.446986	135.763	1.60539	99.6234	18.3967	80.5063	1.18238	44.1974	1.11233	23.4589	2.69037	45.1169	4.81855	24.9794	3.84433
1426399_at	246228	Vwa1	von Willebrand factor A domain containing 1	NM_147776	3.17493e-08	4.96146e-10	3.71923			319.976	60.0644	324.816	18.6492	279.55	46.1989	260.495	24.1159	267.479	6.12374	253.484	25.5451	96.7199	14.7388	65.8258	1.5684	73.508	6.59764	73.7424	23.9569
1419127_at	109648	Npy	neuropeptide Y	NM_023456	5.29556e-14	1.56633e-13	3.71098			694.801	2.27954	682.667	42.888	632.266	6.29953	852.251	34.273	772.12	6.03937	1061.66	111.222	77.1702	10.4606	153.253	8.28488	448.255	1.03632	352.87	18.9029
1418711_at	18590	Pdgfa	platelet derived growth factor, alpha	NM_008808 /// XM_006504658 /// XM_006504659	1.03303e-09	3.09186e-11	3.47922			426.66	38.7888	394.024	40.6753	254.801	86.0179	371.005	20.636	339.597	4.84064	283.214	13.3383	119.032	11.3671	110.248	7.44724	81.5107	2.92324	83.2494	6.50765
1417574_at	20315	Cxcl12	chemokine (C-X-C motif) ligand 12	NM_001012477 /// NM_013655 /// NM_021704	4.04748e-10	1.55159e-11	3.40844			120.63	13.0595	127.653	3.46945	132.486	6.38434	93.8381	4.70439	100.455	5.16139	75.3773	9.34235	40.2215	2.30358	28.6942	1.94479	28.3922	5.66187	29.4564	4.95771
1451427_a_at	353156	Egfl7	EGF-like domain 7	NM_001164564 /// NM_178444 /// NM_198724 /// NM_198725 /// XM_006498141 /// XM_00649814	2.19464e-10	8.46715e-12	3.36638			340.696	44.2711	328.532	21.0644	374.633	35.5828	358.066	1.01459	289.5	9.3492	323.642	23.4119	119.023	5.8015	85.7571	5.50051	107.824	26.2933	90.2003	10.2438
1423085_at	13643	Efnb3	ephrin B3	NM_007911 /// XM_006532160	3.34004e-10	2.56479e-11	3.17013			827.555	28.4538	963.487	19.0065	711.641	87.3027	1223.26	58.8744	1227.02	154.104	1189.62	28.1323	430.977	77.0015	237.418	12.908	406.815	76.8144	243.954	19.3815
1451803_a_at	22340	Vegfb	vascular endothelial growth factor B	NM_001185164 /// NM_011697	6.43727e-10	1.91259e-11	3.00028			410.925	71.2696	420.344	7.60587	402.888	19.9601	359.72	27.0649	344.594	3.64932	399.841	32.279	182.596	23.2887	125.014	12.442	97.3932	7.4196	127.612	14.9212
1421017_at	18183	Nrg3	neuregulin 3	NM_001190187 /// NM_001190188 /// NM_008734 /// XM_006518685 /// XM_006518686 /// XM_00	6.95921e-06	8.96023e-08	2.72296			106.233	0.436471	117.209	59.9007	81.9655	9.37686	73.7054	14.8852	89.4017	1.73353	101.21	0.830766	43.3593	9.03531	42.7268	5.29571	26.4784	1.20434	27.9591	4.82671
1449545_at	14172	Fgf18	fibroblast growth factor 18	NM_008005 /// NR_102395 /// XM_006514526	5.25079e-09	1.07688e-10	2.69847			54.961	1.6239	60.4175	10.8806	52.1082	3.19449	61.5731	5.14359	58.9697	0.75546	58.751	11.2396	22.5405	0.987797	17.9881	1.14298	22.5601	5.13529	22.8963	0.558122
1419426_s_at	18829 /// 65956 /// 100041504 /// 100041593 /// 100042493 /// 100504239 /// 100504346 /	Ccl21a /// Ccl21b /// Ccl21c /// Gm10591 /// Gm13304 /// Gm1987 /// Gm21541 /// LOC100041504 /// LOC100041593	chemokine (C-C motif) ligand 21A (serine) /// chemokine (C-C motif) ligand 21B (leucine	NM_001193666 /// NM_001193667 /// NM_001193668 /// NM_001270360 /// NM_011124 /// NM_01	9.88825e-09	6.329e-10	2.68393			197.029	3.85302	168.174	18.2618	180.173	11.7151	158.411	5.38069	143.464	0.684664	154.336	19.2193	39.9784	1.03961	96.3725	12.6916	41.0465	4.16096	94.809	23.9074
1448259_at	14314	Fstl1	follistatin-like 1	NM_008047	3.16633e-11	7.46414e-12	2.67054			1265.9	150.049	1476.09	37.576	2565.18	104.549	1214.95	10.9189	1336.14	39.7574	1534.58	71.872	906.212	137.479	350.074	17.9379	567.773	44.4697	574.946	33.459
1436978_at	216795	Wnt9a	wingless-type MMTV integration site family, member 9A	NM_139298 /// XM_006532855	3.68819e-06	7.9676e-08	2.60267			86.6357	41.9447	106.949	10.5777	100.462	13.756	100.128	27.6947	90.5977	8.02226	100.579	3.80606	46.3155	2.13801	32.3013	6.17483	47.4175	1.80887	26.3141	1.10992
1437964_at	18232	Nxph2	neurexophilin 2	NM_008752	1.36553e-06	2.49193e-08	2.17408			24.3636	2.78861	37.3495	1.20713	32.2928	4.32357	27.2939	1.19526	31.3774	1.87433	43.3927	3.02262	13.8457	2.17069	14.5474	1.7275	15.191	1.09903	15.9261	3.62271
1450414_at	18591	Pdgfb	platelet derived growth factor, B polypeptide	NM_011057 /// XM_006520590 /// XM_006520591 /// XM_006520592	2.63587e-06	8.05908e-08	2.12426			91.9165	11.0747	98.0386	19.6706	83.2569	16.6343	97.3577	6.32908	86.7289	3.68234	77.7743	1.22831	51.4823	0.757086	34.9802	8.82021	53.7615	2.72652	32.091	5.22446

## Sheet: Fig 1D
Enriched in dorsal and ventral NSCs
Column ID	Entrez Gene	Gene Symbol	Gene Title	RefSeq Transcript ID	p-value(Age - Cell Type - Region)	stepup(p-value(P4 dNSCs and P4 latNSCs vs. P11 LatSVZ and P11 dSVZ and P4 LatSVZ and P4 LatTAPs and P4 dSVZ and P4 dTAPs and P8 LatSVZ and P8 dSVZ))	Fold-Change(P4 dNSCs and P4 latNSCs vs. P11 LatSVZ and P11 dSVZ and P4 LatSVZ and P4 LatTAPs and P4 dSVZ and P4 dTAPs and P8 LatSVZ and P8 dSVZ)		Anti log expression values + SD	P11 Dorsal SVZ	P11 Dorsal SVZ SD	P8 Dorsal SVZ	P8 Dorsal SVZ SD	P4 Dorsal SVZ	P4 Dorsal SVZ SD	P11 Lateral SVZ	P11 Lateral SVZ SD	P8 Lateral SVZ	P8 Lateral SVZ SD	P4 Lateral SVZ	P4 Lateral SVZ SD	P4 Dorsal NSCs	P4 Dorsal NSCs SD	P4 Dorsal TAPs	P4 Dorsal TAPs SD	P4 Lateral NSCs	P4 Lateral NSCs SD	P4 Lateral TAPs	P4 Lateral TAPs SD
1419561_at	20302	Ccl3	chemokine (C-C motif) ligand 3	NM_011337	2.92474e-11	3.91164e-11	26.9282			42.7196	12.1751	80.3632	3.63576	106.356	11.5931	30.8041	1.18918	29.6992	2.10707	68.9175	13.0538	997.498	190.709	18.9235	3.08951	1198.94	196.204	17.2154	6.91762
1421473_at	16175	Il1a	interleukin 1 alpha	NM_010554 /// XM_006498792 /// XM_006498793 /// XM_006498794	5.54331e-09	1.06526e-09	4.00183			13.842	1.15016	17.4561	5.44561	14.3879	2.24332	9.94738	0.420388	9.52929	0.024135	13.0549	0.862904	38.9419	7.52156	9.2655	0.386639	58.1097	0.114162	9.88354	0.294507
1421578_at	20303	Ccl4	chemokine (C-C motif) ligand 4	NM_013652	7.42683e-07	2.88152e-08	3.33243			78.2723	27.7824	85.1361	11.6807	87.5733	24.8832	66.2736	1.96858	66.5952	5.80406	67.8185	4.60653	221.98	34.8264	70.4676	1.49441	271.806	32.9823	72.0129	5.59934
1449984_at	20310	Cxcl2	chemokine (C-X-C motif) ligand 2	NM_009140	3.37402e-08	2.04691e-08	2.89078			9.75558	0.0750551	8.97609	1.46909	6.027	0.215897	6.3385	0.123122	5.70064	0.394699	7.38795	1.4327	33.5881	4.97147	6.75282	0.676881	12.7841	0.540314	7.38233	1.5611
1449399_a_at	16176	Il1b	interleukin 1 beta	NM_008361 /// XM_006498795	2.61544e-08	3.34407e-09	2.42508			69.2458	6.23342	62.8892	4.45718	70.0911	12.1243	61.0086	5.31777	55.2343	3.12022	58.1485	4.76517	137.831	15.7671	50.367	1.70086	149.77	6.93161	50.31	4.70811
1417266_at	20305	Ccl6	chemokine (C-C motif) ligand 6	NM_009139	1.17406e-08	0.000108533	1.8488			114.901	15.2734	187.322	24.4781	144.922	2.77325	68.6233	0.81435	63.6017	2.1091	98.1228	4.25766	110.063	24.6226	15.8247	5.96576	144.83	2.14764	22.095	2.07665
1438629_x_at	14824	Grn	granulin	NM_008175	1.01444e-08	1.01362e-07	1.80128			3106	288.795	4095.39	420.516	3507.91	435.692	1859.97	38.5183	1951.43	181.136	2339.57	79.2108	4312.94	268.197	1955.89	78.6206	4577.23	431.398	1847.26	118.365
Enriched in dorsal and ventral TAPs
Column ID	Entrez Gene	Gene Symbol	Gene Title	RefSeq Transcript ID	p-value(Age - Cell Type - Region)	stepup(p-value(P4 LatTAPs and P4 dTAPs vs. P11 LatSVZ and P11 dSVZ and P4 LatSVZ and P4 dNSCs and P4 dSVZ and P4 latNSCs and P8 LatSVZ and P8 dSVZ))	Fold-Change(P4 LatTAPs and P4 dTAPs vs. P11 LatSVZ and P11 dSVZ and P4 LatSVZ and P4 dNSCs and P4 dSVZ and P4 latNSCs and P8 LatSVZ and P8 dSVZ)		Anti log expression values + SD	P11 Dorsal SVZ	P11 Dorsal SVZ SD	P8 Dorsal SVZ	P8 Dorsal SVZ SD	P4 Dorsal SVZ	P4 Dorsal SVZ SD	P11 Lateral SVZ	P11 Lateral SVZ SD	P8 Lateral SVZ	P8 Lateral SVZ SD	P4 Lateral SVZ	P4 Lateral SVZ SD	P4 Dorsal NSCs	P4 Dorsal NSCs SD	P4 Dorsal TAPs	P4 Dorsal TAPs SD	P4 Lateral NSCs	P4 Lateral NSCs SD	P4 Lateral TAPs	P4 Lateral TAPs SD
1445143_at	238328	Vash1	vasohibin 1	NM_177354	1.80804e-06	1.64556e-07	2.61123			87.2627	29.4408	55.1773	19.0581	98.583	16.0531	55.9399	9.49004	75.8281	0.197671	64.0959	6.35935	134.047	3.82935	235.921	15.2284	141.722	8.76034	202.102	36.6439
1458140_at	20563	Slit2	slit homolog 2 (Drosophila)	NM_001291227 /// NM_001291228 /// NM_178804 /// NR_111900 /// XM_006503812 /// XM_00650	1.27387e-06	1.27356e-06	2.47181			27.2965	4.06716	40.9876	15.319	42.5646	14.686	30.6936	0.0222738	34.0581	6.78119	27.6081	6.82808	121.109	13.8374	147.283	15.5415	49.5975	3.14268	69.5705	12.9109
1434070_at	16449	Jag1	jagged 1	NM_013822	2.42287e-11	5.32343e-11	2.21618			173.311	27.2834	188.945	6.54556	250.016	1.45319	215.956	0.00216871	221.045	2.24715	178.4	14.1922	500.348	20.3456	594.099	21.8875	457.59	8.3893	523.337	51.5816
1449236_at	13389	Dll3	delta-like 3 (Drosophila)	NM_007866	3.11897e-10	6.08302e-11	2.06369			443.175	21.1714	494.135	24.7621	480.357	66.8526	427.187	15.5145	426.948	3.6151	395.12	10.1868	782.649	47.973	1103.59	24.3397	439.658	0.210419	872.763	77.0467
1418093_a_at	13645	Egf	epidermal growth factor	NM_010113 /// XM_006500990 /// XM_006500991 /// XM_006500992 /// XR_375487	2.54342e-08	2.10999e-08	1.98485			42.4993	1.61194	49.9125	2.54456	62.1431	14.9286	49.3797	1.25357	51.9158	6.86223	64.3634	2.84837	101.923	12.0819	119.263	11.3954	128.369	5.38116	135.332	7.36856
1419639_at	13642	Efnb2	ephrin B2	NM_010111 /// XM_006508694	7.59798e-11	2.48084e-09	1.97434			556.732	94.6986	712.261	30.262	928.719	7.25816	1323.85	24.9929	1332.57	47.8222	1222.55	62.1856	2458.9	349.082	2352.61	34.7346	3127.8	3.15367	2602.05	234.433
1441903_x_at	210029	Metrnl	meteorin, glial cell differentiation regulator-like	NM_144797	8.48854e-09	7.64346e-09	1.905			17.0122	1.19392	16.1545	0.567257	21.4598	1.21056	15.2012	1.59175	18.959	1.10684	15.3948	1.14491	23.6645	1.31895	35.7665	0.357772	45.2497	0.0268607	41.8631	7.25577
1446396_at	72713	Angptl1	angiopoietin-like 1	NM_028333	0.000100375	8.06664e-05	1.69854			39.976	10.7042	36.3628	9.99207	51.9571	6.50293	51.6724	12.7063	53.1308	5.91128	39.7881	6.84739	87.6309	17.6516	93.2947	3.61258	93.2977	15.5708	87.1548	10.392

## Sheet: Fig 1E
Enriched in the dorsal niche
Column ID	Entrez Gene	Gene Symbol	Gene Title	RefSeq Transcript ID	p-value(Age - Cell Type - Region)	stepup(p-value(P11 dSVZ and P4 dSVZ and P8 dSVZ vs. P11 LatSVZ and P4 LatSVZ and P4 LatTAPs and P4 dNSCs and P4 dTAPs and P4 latNSCs and P8 LatSVZ))	Fold-Change(P11 dSVZ and P4 dSVZ and P8 dSVZ vs. P11 LatSVZ and P4 LatSVZ and P4 LatTAPs and P4 dNSCs and P4 dTAPs and P4 latNSCs and P8 LatSVZ)		Anti log expression values + SD	P11 Dorsal SVZ	P11 Dorsal SVZ SD	P8 Dorsal SVZ	P8 Dorsal SVZ SD	P4 Dorsal SVZ	P4 Dorsal SVZ SD	P11 Lateral SVZ	P11 Lateral SVZ SD	P8 Lateral SVZ	P8 Lateral SVZ SD	P4 Lateral SVZ	P4 Lateral SVZ SD	P4 Dorsal NSCs	P4 Dorsal NSCs SD	P4 Dorsal TAPs	P4 Dorsal TAPs SD	P4 Lateral NSCs	P4 Lateral NSCs SD	P4 Lateral TAPs	P4 Lateral TAPs SD
1417936_at	20308	Ccl9	chemokine (C-C motif) ligand 9	NM_011338	5.05386e-11	6.10364e-11	5.74761			204.186	23.8792	443.179	46.8339	535.319	28.3663	68.8549	8.26183	73.2766	10.5007	143.313	1.72875	105.528	16.5909	19.2118	5.70261	107.105	2.9626	27.1998	3.4127
1434802_s_at	18205	Ntf3	neurotrophin 3	NM_001164034 /// NM_001164035 /// NM_008742	1.08998e-07	5.43285e-09	4.48906			46.6644	4.49682	93.8845	19.963	69.267	32.5925	15.222	0.614782	11.9022	1.99434	40.7838	13.4102	13.7337	1.93724	11.0679	0.561289	10.6182	1.58462	12.6158	1.79838
1434413_at	16000	Igf1	insulin-like growth factor 1	NM_001111274 /// NM_001111275 /// NM_001111276 /// NM_010512 /// NM_184052	4.33795e-12	6.08974e-12	4.3842			198.642	18.4666	428.268	82.3416	362.121	13.3827	84.8621	0.304795	100.525	0.510963	144.563	14.3838	83.1084	6.32955	29.8677	2.94051	86.005	5.91058	35.8654	4.99041
1455893_at	239405	Rspo2	R-spondin 2 homolog (Xenopus laevis)	NM_172815	2.71617e-09	8.0825e-10	3.18934			82.1952	1.84402	68.4342	0.762522	53.8715	16.1729	18.6156	2.88332	16.3474	1.29756	69.6232	13.1491	18.296	2.05623	18.0081	1.13158	16.2448	0.901398	15.7828	1.93676
1456532_at	71785	Pdgfd	platelet-derived growth factor, D polypeptide	NM_027924	7.26948e-07	2.65063e-08	2.79457			59.3549	21.732	61.6486	7.13755	40.2758	5.96791	22.523	0.974152	26.6133	2.70149	23.0549	0.75467	19.6686	1.30889	14.1354	2.12523	16.0104	4.62373	13.1412	1.44749
1417391_a_at	16170	Il16	interleukin 16	NM_010551	1.62821e-07	3.7421e-09	2.49978			99.25	12.6841	100.443	11.1191	81.9872	4.06473	46.229	3.57032	38.1323	0.437968	46.0663	2.55911	31.659	3.08752	30.9821	5.74417	36.9044	3.52956	35.17	5.37393
1449319_at	192199	Rspo1	R-spondin homolog (Xenopus laevis)	NM_138683	3.03454e-07	2.04342e-08	2.33264			53.2329	4.17026	71.0441	6.14962	46.3916	3.04889	43.022	1.95676	29.3592	2.96978	20.5578	2.36891	21.8131	1.97608	19.182	1.20284	20.9733	1.8303	20.6843	5.78349
1448259_at	14314	Fstl1	follistatin-like 1	NM_008047	3.16633e-11	7.76165e-10	2.04691			1265.9	150.049	1476.09	37.576	2565.18	104.549	1214.95	10.9189	1336.14	39.7574	1534.58	71.872	906.212	137.479	350.074	17.9379	567.773	44.4697	574.946	33.459
1420653_at	21803	Tgfb1	transforming growth factor, beta 1	NM_011577	3.55417e-05	6.25888e-07	1.91387			43.1179	1.69646	59.472	25.5183	75.2833	5.85632	35.1358	3.70738	29.9457	1.39369	29.7773	2.44967	28.2112	3.20035	25.0805	1.88754	31.5655	1.67591	29.4619	0.567035
1460220_a_at	12977	Csf1	colony stimulating factor 1 (macrophage)	NM_001113529 /// NM_001113530 /// NM_007778	1.23043e-06	1.10724e-07	1.88908			180.821	5.86229	238.361	27.1568	294.602	61.2659	128.328	2.70349	122.412	4.82361	129.345	6.27433	167.323	4.38566	100.287	18.8467	144.34	15.3437	87.8957	9.38573
1419675_at	18049	Ngf	nerve growth factor	NM_001112698 /// NM_013609	6.87886e-07	1.95476e-08	1.88326			24.7076	3.53353	36.1016	8.30746	24.5731	2.30629	16.3885	0.583408	15.5705	0.515799	17.2135	1.34948	12.601	1.35003	14.2955	0.860856	11.9294	0	16.2769	0.545166
1448898_at	20308	Ccl9	chemokine (C-C motif) ligand 9	NM_011338	6.69549e-06	7.60094e-07	1.75271			15.3909	0.75745	32.1921	8.72633	30.2867	2.55188	13.7693	0.240638	12.7834	3.0553	18.8524	3.86952	14.9633	0.186931	11.5433	0.294561	15.4264	0.855654	12.1112	1.0303
1455607_at	72780	Rspo3	R-spondin 3 homolog (Xenopus laevis)	NM_028351	7.99298e-05	5.68347e-06	1.70211			22.6634	6.46056	24.8616	2.8101	25.474	6.16145	15.3712	3.35926	13.8892	1.42839	23.5962	0.476714	14.3306	1.04892	11.8693	0.609386	10.9802	1.39949	12.0609	1.45493
1418989_at	13034	Ctse	cathepsin E	NM_007799	8.76173e-05	1.0877e-06	1.67079			60.5734	5.59445	60.7113	11.8084	68.3993	0.098072	37.0526	4.97327	39.2893	0.517954	46.6152	3.86681	38.3642	7.35498	32.9022	2.80237	37.6615	4.27169	34.0211	2.32111
1449982_at	16156	Il11	interleukin 11	NM_008350	0.000203868	1.67991e-06	1.65895			58.5754	6.52941	46.0264	6.62255	49.8996	6.30773	30.2744	5.12332	30.2533	4.48163	30.5343	5.28202	28.3398	3.85017	34.7771	3.17681	27.6497	0.455588	35.2711	2.47735
1421793_at	14166	Fgf11	fibroblast growth factor 11	NM_010198	4.13883e-05	8.93237e-07	1.65533			68.5654	10.8123	64.3691	3.84009	73.5297	17.7637	50.9639	9.2472	36.7667	0.607217	48.06	6.65599	36.3812	0.219537	34.4154	2.86992	40.2291	0.261882	45.3325	4.22193
1453132_a_at	66284	Gkn2	gastrokine 2	NM_025467	0.00117254	4.02247e-05	1.93645			85.1305	1.99734	115.912	13.3788	151.85	69.7241	72.4727	8.29286	57.1628	2.59448	67.9124	3.18645	52.1736	5.67773	50.1607	4.26251	57.4451	8.54553	53.1668	9.24648
1421282_at	12160	Bmp5	bone morphogenetic protein 5	NM_007555	4.13276e-06	3.1587e-07	1.92639			28.4368	4.29294	17.2678	0.806488	14.7797	1.95544	10.999	0.000118011	11.3044	0.431935	11.2702	1.6934	8.64215	0.271529	9.9087	1.48904	8.53207	0.181943	10.04	0.989569
1422243_at	14178	Fgf7	fibroblast growth factor 7	NM_008008	4.43825e-07	8.16386e-09	1.90805			76.6068	1.25467	62.6316	1.75183	69.9116	3.35457	41.0455	1.30323	39.9728	1.23244	35.3279	4.96766	34.3825	1.4977	33.9947	2.50406	36.4532	1.77229	34.7228	3.43394
1450414_at	18591	Pdgfb	platelet derived growth factor, B polypeptide	NM_011057	2.63587e-06	2.7722e-05	1.85556			108.002	13.0128	115.195	23.113	97.8269	19.5453	97.3577	6.32908	86.7289	3.68234	77.7743	1.22831	51.4823	0.757086	34.9802	8.82021	53.7615	2.72652	32.091	5.22446
1451866_a_at	15234	Hgf	hepatocyte growth factor	NM_010427	0.000174566	4.10778e-06	1.84638			48.9725	9.1981	45.9098	4.0683	60.2787	8.63547	24.0472	1.97796	23.244	4.81605	24.715	4.38515	35.6032	4.36813	27.7556	1.45073	31.8881	2.44267	29.3485	0.96805
1451944_a_at	21943	Tnfsf11	tumor necrosis factor (ligand) superfamily, member 11	NM_011613	0.00939594	7.39053e-05	1.81278			44.6104	18.4194	35.7334	3.05112	39.0879	3.7728	22.256	1.67464	18.9819	3.34359	23.8988	3.57849	20.6545	2.16206	21.2647	0.220064	20.881	0.692441	23.6581	3.19834
1419529_at	83430	Il23a	interleukin 23, alpha subunit p19	NM_031252	0.00110883	1.93121e-05	1.7905			25.2841	9.14562	21.849	0.0258388	17.4129	3.26061	13.3721	1.07193	12.1024	0.733603	12.5579	0.352509	10.8533	0.839402	12.3485	0.961858	10.6832	0.13781	10.4815	1.04053
1453969_at	73244	Prl8a1	prolactin family 8, subfamily a, member 1	NM_028477	0.0305188	0.000363909	1.78461			14.4465	4.87909	13.1239	3.10446	14.5002	3.63718	6.9102	0.182631	7.88777	0.364544	8.76266	0.0439878	6.71474	0.534592	7.62094	1.04945	8.0885	0.536359	8.36128	2.298
1422300_at	18121	Nog	noggin	NM_008711	0.00624288	6.22928e-05	1.76706			29.7059	3.58015	36.884	8.46168	33.1417	0.599492	18.8243	2.61946	18.2526	0.56506	20.6243	3.44479	20.247	0.838423	18.1348	4.83341	18.801	0.149495	16.5834	1.97676
1426238_at	12153	Bmp1	bone morphogenetic protein 1	NM_009755 /// NR_033241	5.07602e-06	9.3263e-07	1.76102			646.216	111.182	648.211	21.9759	728.958	133.919	398.911	14.4989	398.132	3.68745	507.5	24.5879	458.334	45.3611	327.72	22.8693	339.107	27.7212	282.74	15.1265
1456428_at	20309	Cxcl15	chemokine (C-X-C motif) ligand 15	NM_011339	0.000371577	9.77665e-06	1.74925			68.3763	9.6154	47.5424	3.48812	50.9863	17.5019	36.4678	0.900427	30.7703	2.85013	33.518	2.13217	26.7418	1.42136	30.83	1.15754	29.2378	0.74642	30.6605	1.44623
1450334_at	60505	Il21	interleukin 21	NM_021782	0.018236	0.00105916	1.73888			37.45	8.94734	31.2726	1.44267	21.8405	9.86807	17.2168	4.03288	18.0037	2.58095	20.0752	3.33588	14.5861	0.815572	15.7789	2.89905	14.8931	1.72996	16.7656	1.99084
1422941_at	93735	Wnt16	wingless-related MMTV integration site 16	NM_053116	7.8808e-06	1.22898e-06	1.73683			53.7826	2.05141	33.995	2.13332	44.5434	0.0030395	30.4653	2.75152	24.4019	2.7542	31.9984	2.46267	20.9251	0.92575	24.1034	2.73723	22.8609	2.72454	22.376	2.84003
1422176_at	64654	Fgf23	fibroblast growth factor 23	NM_022657	0.0200202	0.000240164	1.72919			25.7768	9.05423	20.4083	5.76039	18.9936	1.48145	13.4027	2.23622	12.3328	0.648675	13.0681	0.391228	12.4709	1.68373	11.5311	1.47451	11.114	1.0769	12.1643	0.685327
1440240_at	208990	Npb	neuropeptide B	NM_153288	6.32814e-06	4.92465e-07	1.72027			120.362	17.8447	87.8838	3.67969	75.0906	7.78272	61.8662	0.492491	50.063	3.6042	63.7114	1.14931	50.2485	0.878192	56.0124	3.13329	46.3443	1.6308	50.3657	7.07027
1450488_at	56221	Ccl24	chemokine (C-C motif) ligand 24	NM_019577	5.45435e-07	1.03342e-07	1.71917			146.769	5.13536	141.126	8.81647	94.9901	15.1359	92.6599	1.41744	71.4866	2.07465	80.976	4.3533	63.8158	1.07953	67.0902	5.56156	71.6781	1.80386	65.5998	5.50045
1449195_s_at	66102	Cxcl16	chemokine (C-X-C motif) ligand 16	NM_023158	0.0372463	0.000497402	1.71729			54.3872	15.0971	48.8702	15.5476	48.7493	17.4965	28.4781	4.85445	29.3523	2.89257	34.1244	1.52116	27.9437	2.36736	25.8027	0.337022	28.2395	0.0874753	28.027	2.0669
1421686_at	60531	Npvf	neuropeptide VF precursor	NM_021892	0.00963423	8.1559e-05	1.71276			47.2424	0.711286	46.8624	12.8865	53.8882	11.3757	29.2837	2.85692	26.9992	0.0575598	28.6815	0.232485	29.2174	2.38483	25.7481	4.56487	28.5442	1.42474	31.6667	4.18377
1439002_s_at	18775 /// 215028	Prl3d1 /// Prl3d2	prolactin family 3, subfamily d, member 1 /// prolactin family 3, subfamily d, member 1	NM_001205322 /// NM_008864 /// NM_172155	0.000983205	8.08888e-06	1.70657			36.1704	0.417456	39.7672	2.21228	47.6022	15.9185	22.7978	1.207	25.067	0.108609	21.5271	0.0734043	24.6692	0.70017	24.245	1.75173	22.2385	0.81387	26.0824	2.03692
1419708_at	22420	Wnt6	wingless-related MMTV integration site 6	NM_009526	3.99968e-06	1.0844e-07	1.69759			86.9667	15.7611	87.502	2.09881	84.0944	4.95062	57.254	2.63455	55.1102	4.69187	55.9955	1.02014	43.3993	1.34111	48.8234	1.81832	46.164	2.91624	49.423	2.24618
1450613_x_at	15974	Ifnab	interferon alpha B	NM_008336	0.000610018	1.98502e-05	1.69517			17.7243	2.70486	15.8992	4.37336	12.4364	0.304157	9.91286	0.132017	9.78298	0.627964	10.149	1.36315	7.91189	0.480557	8.65499	0.575855	7.87891	0.360707	8.34799	1.00799
1420005_s_at	12155	Bmp15	bone morphogenetic protein 15	NM_009757	1.10297e-06	8.42445e-08	1.68643			11.2552	0.654467	8.70049	0.694393	10.2488	0.733668	7.45984	0.631474	6.14242	0.724859	6.1095	0.312853	5.26679	0.321237	6.09852	0.0458128	5.63641	0.288848	5.12995	0.280303
1450282_at	14175	Fgf4	fibroblast growth factor 4	NM_010202	0.000512752	8.77147e-06	1.68554			142.659	33.8659	141.316	8.12979	131.898	5.58685	86.3439	9.13907	73.7178	1.06857	100.101	6.45238	74.2298	6.53601	75.6219	10.5814	84.5425	0	81.9947	5.2906
1418376_at	14170	Fgf15	fibroblast growth factor 15	NM_008003	0.00057336	4.44475e-05	1.67678			21.2597	1.79091	37.9573	11.5876	23.0982	3.25769	18.1208	0.689334	14.9537	0.876424	17.0015	2.36159	14.1693	0.624386	15.6521	1.4389	15.0168	1.13814	15.2115	1.46353
1450388_s_at	65960	Twsg1	twisted gastrulation homolog 1 (Drosophila)	NM_023053	1.69006e-06	1.88856e-07	1.67606			691.453	27.1714	611.906	55.0477	995.001	82.6094	478.737	11.3397	466.703	1.93278	510.082	39.4756	413.853	34.5841	398.219	12.1922	415.254	26.3273	457.831	44.1521
1422093_at	22416	Wnt3a	wingless-related MMTV integration site 3A	NM_009522	0.000646983	1.05688e-05	1.67391			110.276	7.62391	107.207	32.1122	83.4053	6.93229	63.3588	2.06777	55.3062	1.99368	60.239	1.00511	51.946	4.97483	59.1692	3.42231	60.2089	2.19646	63.7411	3.68069
1422228_at	20890	Wnt8a	wingless-related MMTV integration site 8A	NM_009290	0.0226334	0.000312209	1.67195			37.2726	8.12376	30.9641	9.45181	28.3124	4.88883	19.2871	0.0322555	16.9478	3.34062	19.7747	4.90534	17.5958	0.509438	19.5695	0.71209	18.5961	1.00956	21.006	1.65843
1449549_at	13642	Efnb2	ephrin B2	NM_010111	0.0215835	0.000616257	1.66009			35.2417	3.93956	30.5266	12.4962	22.5957	7.15915	17.6175	1.42077	16.6995	1.25628	17.829	1.58548	16.1087	1.31846	16.1933	0.509246	16.5873	0.97864	18.4878	0.760706
1419412_at	16963	Xcl1	chemokine (C motif) ligand 1	NM_008510	4.33296e-05	5.59403e-07	1.65957			23.6258	3.55083	25.3667	2.75869	23.0006	1.15634	14.8605	0.56427	13.4448	0.157405	16.1867	1.02656	12.6914	0.565097	15.0569	0.910907	14.1572	0.128001	14.7927	1.44812
1425377_at	22408	Wnt1	wingless-related MMTV integration site 1	NM_021279	9.79929e-05	2.60382e-06	1.65901			38.2473	3.23409	29.741	2.79862	28.8883	3.2224	22.5799	2.30152	18.9802	1.17266	20.2617	1.80669	17.9692	1.58707	17.4229	1.11306	18.3074	0.562985	20.0351	2.25421
1449032_at	56635	Prl2a1	prolactin family 2, subfamily a, member 1	NM_019991	0.0100864	0.000149457	1.6572			53.2133	22.5176	49.0922	2.33462	48.8638	0.441583	34.8344	5.39344	31.1861	1.7196	32.634	2.81947	27.4021	0.83301	29.9969	0.559673	27.3707	0.615173	27.1028	1.5592
1422923_at	14174	Fgf3	fibroblast growth factor 3	NM_008007	3.49564e-05	1.32273e-05	1.65147			57.0887	7.96923	77.1518	14.1221	49.2857	6.11196	38.3878	2.68429	40.3903	5.71285	42.6903	1.72152	26.7126	2.19782	31.1831	1.8667	40.7553	0.593635	36.6245	3.55122

## Sheet: Fig 1F
Enriched in dorsal NSCs
Column ID	Entrez Gene	Gene Symbol	Gene Title	RefSeq Transcript ID	p-value(Age - Cell Type - Region)	stepup(p-value(P4 dNSCs vs. P11 LatSVZ and P11 dSVZ and P4 LatSVZ and P4 LatTAPs and P4 dSVZ and P4 dTAPs and P4 latNSCs and P8 LatSVZ and P8 dSVZ))	Fold-Change(P4 dNSCs vs. P11 LatSVZ and P11 dSVZ and P4 LatSVZ and P4 LatTAPs and P4 dSVZ and P4 dTAPs and P4 latNSCs and P8 LatSVZ and P8 dSVZ)		Anti log expression values + SD	P11 Dorsal SVZ	P11 Dorsal SVZ SD	P8 Dorsal SVZ	P8 Dorsal SVZ SD	P4 Dorsal SVZ	P4 Dorsal SVZ SD	P11 Lateral SVZ	P11 Lateral SVZ SD	P8 Lateral SVZ	P8 Lateral SVZ SD	P4 Lateral SVZ	P4 Lateral SVZ SD	P4 Dorsal NSCs	P4 Dorsal NSCs SD	P4 Dorsal TAPs	P4 Dorsal TAPs SD	P4 Lateral NSCs	P4 Lateral NSCs SD	P4 Lateral TAPs	P4 Lateral TAPs SD
1418930_at	15945	Cxcl10	chemokine (C-X-C motif) ligand 10	NM_021274	9.77784e-09	5.3024e-09	2.72463			40.4095	0.328179	32.6893	4.69931	36.113	6.94014	28.7132	2.0171	32.4165	2.93325	28.9068	1.04826	92.3791	5.94439	31.2709	1.16197	48.3505	1.2026	30.7119	1.1476
1416211_a_at	19242	Ptn	pleiotrophin	NM_008973 /// XM_006505757	1.19332e-10	3.72164e-08	2.51589			1936.3	243.913	2117.73	31.1641	1992.85	105.343	2137.89	189.973	2948.82	307.405	3058.18	115.782	4813.54	625.581	1329.42	56.5717	2726.02	369.478	581.354	53.1999
1434201_at	83453	Chrdl1	chordin-like 1	NM_001114385 /// NM_031258 /// XM_006529001 /// XM_006529002 /// XM_006529003	2.59084e-06	3.46097e-07	2.32393			48.085	9.42776	44.8147	10.4953	37.2431	0.87441	39.714	3.28186	36.2984	3.85167	42.3749	7.01317	103.063	5.34294	57.9768	3.28467	46.5044	0.855963	51.6497	1.19887
1439766_x_at	22341	Vegfc	vascular endothelial growth factor C	NM_009506	2.62192e-07	1.74787e-07	2.3066			68.3738	1.16722	78.8168	23.8745	85.3385	7.38824	57.1567	1.67695	54.7749	3.66309	67.2512	1.50254	168.765	7.12198	100.814	4.73549	102.123	11.7571	61.8567	1.56276
1448201_at	20319	Sfrp2	secreted frizzled-related protein 2	NM_009144 /// XM_006501183	1.0206e-07	1.34943e-07	2.30598			134.827	2.36321	148.383	23.0017	238.152	16.4346	94.5535	7.19787	135.669	6.06185	155.99	0.809079	324.671	26.6575	157.219	5.14414	137.03	17.1594	106.182	17.3877
1419123_a_at	54635	Pdgfc	platelet-derived growth factor, C polypeptide	NM_019971 /// XM_006501712	5.33399e-09	8.5666e-07	1.97201			251.453	59.5411	292.823	43.4993	251.919	14.4761	226.947	15.6159	228.593	17.6859	184.838	0.314743	383.023	14.079	185.606	1.50999	163.027	1.88666	74.8423	8.45522
1420909_at	22339	Vegfa	vascular endothelial growth factor A	NM_001025250 /// NM_001025257 /// NM_001110266 /// NM_001110267 /// NM_001110268 /// NM	0.00870971	0.000775887	1.73831			126.061	25.4449	134.401	51.9458	149.814	21.0165	128.914	12.913	130.741	16.1503	125.229	6.93207	238.559	25.0952	178.329	11.1792	156.71	16.186	121.059	25.1408
1434458_at	14313	Fst	follistatin	NM_008046 /// XM_006517527 /// XM_006517528	0.000413097	2.68653e-05	1.6965			27.2163	0.216035	19.8323	1.73692	27.1834	3.96634	22.7754	2.26755	22.1813	3.10769	23.2753	0.00641846	39.9359	3.82055	25.1776	3.942	22.9696	3.56815	22.3003	1.46733
1419282_at	20293	Ccl12	chemokine (C-C motif) ligand 12	NM_011331	4.54101e-05	0.000499935	1.72201			25.0826	6.63734	21.1044	1.12606	19.0477	1.13551	15.301	2.01077	14.8258	0.854335	14.9915	1.16567	29.0726	5.4044	11.9397	0.710746	19.9231	1.73632	12.759	0.393924
1448254_at	19242	Ptn	pleiotrophin	NM_008973 /// XM_006505757	1.8407e-09	8.63568e-06	1.71004			2925.94	139.176	3061.97	95.3249	2911.6	233.615	3494.82	141.886	3383.57	169.915	3769.95	534.389	4826.84	475.945	2228.43	93.8529	3579.71	238.075	1203.61	71.5858
1456524_at	211323	Nrg1	neuregulin 1	NM_178591 /// XM_006509059 /// XM_006509060 /// XM_006509061 /// XM_006509062 /// XM_00	0.01917	0.0115854	1.70627			31.6855	5.36811	39.6933	17.1873	49.3224	6.49599	43.5486	0.0388183	52.087	0.339988	48.6278	5.07834	82.0898	21.7193	59.0868	6.39788	59.0489	0.906944	49.849	4.34516
1437933_at	15245	Hhip	Hedgehog-interacting protein	NM_020259 /// XM_006530702	0.00178277	0.000535861	1.66558			28.8992	4.64206	34.0952	6.03492	23.3541	2.65489	22.4311	0.407307	26.3867	0.0171811	28.9137	3.11963	46.2879	6.36255	32.7953	1.32146	27.6712	2.90542	26.7808	2.73811
1418350_at	15200	Hbegf	heparin-binding EGF-like growth factor	NM_010415	1.54089e-06	1.82143e-05	1.65806			137.464	13.3288	151.438	12.4861	100.882	11.9339	183.644	12.5338	177.733	7.4853	160.875	1.84137	248.689	12.7677	175.2	9.61399	167.253	0.736347	119.618	12.4712
1455577_at	56838	Ccl28	chemokine (C-C motif) ligand 28	NM_020279 /// XM_006517727	0.000555974	0.000524502	1.65345			58.1412	11.6682	77.8313	8.07181	76.7527	10.6762	72.267	8.96118	74.9201	7.62737	105.105	3.54409	129.245	16.5889	82.6661	2.47476	92.1206	9.64449	70.7821	4.05356
Enriched in dorsal TAPs
Column ID	Entrez Gene	Gene Symbol	Gene Title	RefSeq Transcript ID	p-value(Age - Cell Type - Region)	stepup(p-value(P4 dTAPs vs. P11 LatSVZ and P11 dSVZ and P4 LatSVZ and P4 LatTAPs and P4 dNSCs and P4 dSVZ and P4 latNSCs and P8 LatSVZ and P8 dSVZ))	Fold-Change(P4 dTAPs vs. P11 LatSVZ and P11 dSVZ and P4 LatSVZ and P4 LatTAPs and P4 dNSCs and P4 dSVZ and P4 latNSCs and P8 LatSVZ and P8 dSVZ)		Anti log expression values + SD	P11 Dorsal SVZ	P11 Dorsal SVZ SD	P8 Dorsal SVZ	P8 Dorsal SVZ SD	P4 Dorsal SVZ	P4 Dorsal SVZ SD	P11 Lateral SVZ	P11 Lateral SVZ SD	P8 Lateral SVZ	P8 Lateral SVZ SD	P4 Lateral SVZ	P4 Lateral SVZ SD	P4 Dorsal NSCs	P4 Dorsal NSCs SD	P4 Dorsal TAPs	P4 Dorsal TAPs SD	P4 Lateral NSCs	P4 Lateral NSCs SD	P4 Lateral TAPs	P4 Lateral TAPs SD
1422912_at	12159	Bmp4	bone morphogenetic protein 4	NM_007554 /// XM_006518467 /// XM_006518468	4.47393e-14	1.89415e-08	2.15413			1343.02	70.5591	1297.3	80.1222	347.134	12.0677	211.252	10.3164	167.983	9.77773	94.3067	5.95491	185.935	9.13456	522.987	42.3219	101.547	15.8382	76.3828	8.98223
1436718_at	18231	Nxph1	neurexophilin 1	NM_008751 /// XM_006505010	6.93699e-08	1.01692e-07	2.1166			112.762	9.57408	183.402	35.6828	115.126	21.1574	199.362	3.79237	225.542	15.708	161.817	8.9869	245.914	3.89759	380.008	19.8406	269.505	16.3918	171.798	15.7801
1425212_a_at	29820	Tnfrsf19	tumor necrosis factor receptor superfamily, member 19	NM_001164155 /// NM_013869	2.00532e-08	3.04859e-08	1.91478			119.842	7.51604	119.802	2.47046	110.041	24.0706	91.5452	4.15756	119.818	0.934309	86.337	4.45723	158.415	5.93775	199.841	8.87045	75.9943	2.08105	82.3596	2.99528
1425842_at	13612	Edil3	EGF-like repeats and discoidin I-like domains 3	NM_001037987 /// NM_010103	0.00185729	9.89584e-05	1.66538			9.02379	0.827079	8.23896	0.194109	7.10576	1.16827	8.37103	0.853531	8.07897	0.339572	7.27501	2.38473	10.5064	1.38261	14.0025	0.261756	8.99427	1.20029	8.9887	0.531631
1424945_at	83453	Chrdl1	chordin-like 1	NM_001114385 /// NM_031258 /// XM_006529001 /// XM_006529002 /// XM_006529003	0.000159675	0.0021816	1.66271			22.9921	4.91866	20.2647	2.03	28.662	9.56018	22.3862	1.84099	14.7859	1.58247	18.1025	3.78484	50.4294	13.4259	40.3644	2.03136	29.5366	3.44359	32.879	4.18208

## Sheet: Fig 1G
Enriched in the lateral SVZ
Column ID	Entrez Gene	Gene Symbol	Gene Title	RefSeq Transcript ID	p-value(Age - Cell Type - Region)	stepup(p-value(P11 LatSVZ and P4 LatSVZ and P8 LatSVZ vs. P11 dSVZ and P4 LatTAPs and P4 dNSCs and P4 dSVZ and P4 dTAPs and P4 latNSCs and P8 dSVZ))	Fold-Change(P11 LatSVZ and P4 LatSVZ and P8 LatSVZ vs. P11 dSVZ and P4 LatTAPs and P4 dNSCs and P4 dSVZ and P4 dTAPs and P4 latNSCs and P8 dSVZ)		Anti log expression values + SD	P11 Dorsal SVZ	P11 Dorsal SVZ SD	P8 Dorsal SVZ	P8 Dorsal SVZ SD	P4 Dorsal SVZ	P4 Dorsal SVZ SD	P11 Lateral SVZ	P11 Lateral SVZ SD	P8 Lateral SVZ	P8 Lateral SVZ SD	P4 Lateral SVZ	P4 Lateral SVZ SD	P4 Dorsal NSCs	P4 Dorsal NSCs SD	P4 Dorsal TAPs	P4 Dorsal TAPs SD	P4 Lateral NSCs	P4 Lateral NSCs SD	P4 Lateral TAPs	P4 Lateral TAPs SD
1416783_at	21333	Tac1	tachykinin 1	NM_009311 /// XM_006505027 /// XM_006505028	3.95645e-16	2.08433e-14	29.8261			365.668	50.6027	602.542	75.4075	508.823	80.2967	7540.21	167.377	7550.2	301.386	4436.49	122.16	85.754	12.6979	200.654	14.4644	92.5095	7.0342	110.242	4.93986
1427038_at	18619	Penk	preproenkephalin	NM_001002927 /// XM_006537675	9.72372e-17	7.86876e-15	21.2399			127.821	0.84421	183.157	9.86251	125.931	8.0832	3543.19	154.212	2628.69	45.0582	779.35	50.9921	43.7913	5.71292	51.5637	3.65732	119.631	8.23478	66.3126	6.27266
1418456_a_at	57266	Cxcl14	chemokine (C-X-C motif) ligand 14	NM_019568 /// XM_006517307 /// XM_006517308	3.21111e-13	9.89061e-13	10.8385			212.718	3.10516	206.365	9.29813	182.391	16.539	1213.85	46.9487	1368.39	99.9856	883.139	195.827	103.364	15.0955	52.7272	7.26273	61.8583	2.1977	50.9737	6.40565
1421943_at	21802	Tgfa	transforming growth factor alpha	NM_031199	2.15063e-16	2.67746e-14	3.58928			479.617	11.8628	554.844	6.05952	308.682	3.04234	1317.74	20.1043	1402.44	28.034	1144.44	52.762	483.148	28.3363	613.841	28.7699	186.361	0.730628	165.028	8.94872
1449425_at	22413	Wnt2	wingless-type MMTV integration site family, member 2	NM_023653 /// XM_006505045	7.01237e-09	5.49843e-09	3.05526			32.0932	6.95029	23.7195	3.97984	23.9587	3.59071	116.223	13.3361	89.7768	19.7284	25.7989	6.48814	16.0534	0.592436	17.5864	0.37593	17.6013	1.57864	19.8473	1.00618
1430375_a_at	20301 /// 100039863 /// 100039939 /// 100040048 /// 100861978	Ccl27a /// Ccl27b /// Gm13306 /// Gm2506 /// LOC100861978	chemokine (C-C motif) ligand 27A /// chemokine (C-C motif) ligand 27b /// predicted gen	NM_001048179 /// NM_001164044 /// NM_001164045 /// NM_001164046 /// NM_001199959 /// NM	6.86456e-13	2.87283e-11	2.76281			557.833	1.48413	548.736	57.55	551.691	36.1983	875.588	22.6301	890.988	57.4116	942.615	70.7933	273.12	15.5262	111.365	8.16531	366.627	49.4358	212.304	12.9054
1416266_at	18610	Pdyn	prodynorphin	NM_001286502 /// NM_018863	2.54277e-09	3.98747e-09	2.74942			73.2154	5.67986	86.3547	15.8228	55.5362	2.69447	164.92	18.8127	124.584	13.6263	86.6739	5.15076	32.785	1.57735	28.2748	0.885088	30.1152	2.24681	33.496	8.05114
1431170_at	13638	Efna3	ephrin A3	NM_010108 /// XM_006500988 /// XM_006500989	2.49591e-08	3.07953e-08	2.71344			126.124	3.96977	177.741	1.76273	121.69	19.9914	210.988	22.8463	259.207	27.4612	237.537	2.65296	73.3219	12.771	52.8801	11.7299	70.8289	9.00183	50.4231	6.1603
1438718_at	14180	Fgf9	fibroblast growth factor 9	NM_013518 /// XM_006518553 /// XM_006518554	2.78807e-06	2.52302e-07	2.66457			34.871	11.1273	43.5062	4.70918	29.1773	10.7857	75.0272	2.35113	67.3556	6.94512	69.9922	16.4343	19.937	1.07135	23.7972	2.99311	19.3627	1.71855	23.6794	2.54363
1454974_at	18208	Ntn1	netrin 1	NM_008744	4.35394e-08	1.45286e-08	2.60904			55.7497	2.41696	62.91	4.41961	53.9686	20.4794	192.064	29.5643	209.431	14.279	221.821	11.1979	85.3506	4.78796	131.045	7.99949	143.128	6.17438	67.9435	5.24815
1434962_x_at	20301	Ccl27a	chemokine (C-C motif) ligand 27A	NM_001048179 /// NM_001164044 /// NM_001164045 /// NM_011336 /// XM_006537704 /// XM_00	1.13605e-10	5.52687e-10	2.54811			388.985	24.7407	361.763	46.8862	321.431	24.3941	658.666	3.79703	749.776	14.6393	649.94	92.6157	260.221	18.7601	105.044	7.20188	364.794	4.98207	225.286	32.8745
1417851_at	55985	Cxcl13	chemokine (C-X-C motif) ligand 13	NM_018866	4.10371e-07	4.07263e-08	2.4856			17.0328	3.89019	13.9566	0.959594	19.6254	5.83765	45.4894	6.33881	46.9952	0.753961	23.6133	1.59988	12.7971	0.998473	13.147	1.01608	14.1465	0.368129	14.9688	2.19363
1436075_at	54612	Sfrp5	secreted frizzled-related sequence protein 5	NM_018780	2.44907e-08	1.25013e-08	2.27963			96.944	5.24004	69.3444	10.8007	115.277	20.125	203.039	1.58738	164.756	15.7844	229.661	27.8595	84.8962	7.99686	59.0298	3.84377	143.828	29.3879	66.2366	3.42539
1419080_at	14573	Gdnf	glial cell line derived neurotrophic factor	NM_010275 /// XM_006519962	1.36563e-06	2.0729e-07	2.25411			22.7679	6.30485	18.2001	3.86042	16.8149	3.14418	43.8328	2.09339	35.7552	4.14711	25.0384	3.34581	13.5743	0.678524	12.9218	1.03011	12.7996	0.698611	11.6808	1.86211
1415821_at	20320	Nptn	neuroplastin	NM_001293673 /// NM_009145 /// XM_006510882 /// XM_006510883 /// XM_006510884 /// XM_00	1.59605e-07	4.79106e-08	2.07179			1752.98	128.972	2533.22	333.402	1717.27	114.4	3806.69	175.544	3823	53.5392	2802.49	176.926	1842.4	50.5677	1329.55	82.137	1650.43	140.371	1160.72	252.31
1417879_at	66208	Nenf	neuron derived neurotrophic factor	NM_025424 /// XM_006497193	7.39324e-09	1.63037e-08	1.92892			741.531	53.5893	665.117	41.7904	641.725	16.0613	870.274	80.1247	838.25	64.7132	1050.34	45.7294	443.427	67.8687	339.566	10.6253	326.54	8.84108	349.603	43.6978
1450835_a_at	14588	Gfra4	glial cell line derived neurotrophic factor family receptor alpha 4	NM_001136063 /// NM_001271001 /// NM_001271002 /// NM_020014 /// XM_006498771 /// XR_37	2.02399e-06	5.06093e-07	1.89533			83.1495	2.2833	74.0018	2.26676	72.6608	2.1991	148.093	42.0052	99.6011	23.191	105.273	20.5817	46.4565	1.85669	55.1896	2.42716	50.1279	0.607762	50.075	3.10859
1424785_at	70726	Angptl6	angiopoietin-like 6	NM_145154	8.95021e-07	4.43463e-08	1.79692			346.331	44.4205	342.236	61.8418	335.842	50.1085	566.03	4.10009	520.535	19.7832	579.27	9.27707	274.073	20.6609	300.818	6.68599	259.601	25.9953	320.58	15.545
1423367_at	22421	Wnt7a	wingless-type MMTV integration site family, member 7A	NM_009527	8.35964e-08	1.0353e-07	1.79176			393.183	26.868	445.836	2.44611	595.908	30.7225	617.81	43.6927	697.927	15.3778	770.977	15.5155	391.95	22.7733	247.129	18.9602	432.723	38.5404	299.84	59.3897
1419411_at	21334	Tac2	tachykinin 2	NM_001199971 /// NM_009312	4.40488e-05	6.68954e-05	1.76276			42.102	10.537	28.578	10.2636	34.2802	3.24057	49.2497	11.7012	39.3707	6.78822	38.9661	0.154979	23.3517	2.68216	15.3449	2.96261	17.7438	1.05981	17.7755	1.77542
1416200_at	77125	Il33	interleukin 33	NM_001164724 /// NM_133775 /// XM_006527463	0.000122103	1.18401e-05	1.69518			36.0372	9.47808	27.7359	5.22127	31.2075	2.64785	49.2625	14.7388	54.0478	2.93451	39.6669	1.40351	26.5228	0.615265	22.9909	2.89141	29.4105	0.283619	22.9435	1.20326
1436869_at	20423	Shh	sonic hedgehog	NM_009170 /// XM_006535648 /// XM_006535649	2.35336e-06	2.10323e-06	1.69077			101.615	25.2952	92.1613	12.4564	93.7752	12.3257	129.476	8.60476	124.845	16.8138	110.909	1.17536	49.6031	1.50303	57.9437	6.17245	64.1344	3.14465	62.3119	6.94149
1441884_x_at	20312	Cx3cl1	chemokine (C-X3-C motif) ligand 1	NM_009142	8.47772e-06	8.91776e-06	1.68801			25.1996	6.50911	31.209	4.97224	18.9315	4.13999	34.6549	3.05177	31.1884	0.835275	27.3992	0.859001	14.3498	1.92421	15.16	0.699359	12.4103	0.519542	18.0498	2.41822
1418497_at	14168	Fgf13	fibroblast growth factor 13	NM_001290414 /// NM_001290415 /// NM_010200 /// XM_006527793 /// XM_006527794 /// XM_00	9.56591e-08	1.40978e-06	1.67701			1786.1	146.51	1923.89	435.379	2223.74	21.6322	2303.19	39.227	2448.96	77.6583	3033.94	153.39	1854.53	92.7862	864.846	25.8415	1842.59	44.5104	920.69	179.088
1449093_at	13019	Ctf1	cardiotrophin 1	NM_007795 /// XM_006507316 /// XM_006507317 /// XM_006507318	9.89026e-09	1.87734e-08	1.66156			171.221	30.0016	161.516	19.8794	168.023	11.8049	252.837	12.5588	233.944	8.01314	254.459	7.6121	186.482	6.47914	102.868	3.88791	171.689	4.14255	105.744	3.59275
1449187_at	18590	Pdgfa	platelet derived growth factor, alpha	NM_008808 /// XM_006504658 /// XM_006504659	0.001815	0.000104819	1.80806			127.621	19.4492	122.678	17.384	103.908	32.9313	191.601	11.9285	184.75	14.9484	200.178	18.4525	108.629	6.72796	115.45	4.14263	81.291	20.1348	96.6646	12.7651
1418219_at	16168	Il15	interleukin 15	NM_001254747 /// NM_008357 /// XM_006530705 /// XM_006530706 /// XM_006530707 /// XM_00	2.0571e-07	3.2122e-06	1.7327			21.187	2.03113	27.0439	4.01235	26.7099	0.423042	37.2327	0.902037	31.1006	3.0998	33.696	4.21321	19.8155	1.36862	14.0354	0.360287	21.6596	1.40641	11.9602	1.55531
1439959_at	14166	Fgf11	fibroblast growth factor 11	NM_001291104 /// NM_010198 /// XM_006532187 /// XM_006532188 /// XM_006532189	2.31724e-06	2.34153e-07	1.7056			197.995	5.76789	172.069	21.2513	135.215	7.86457	284.835	22.0566	300.314	27.7515	246.721	4.76849	172.099	13.9936	154.442	6.46956	148.719	6.0332	161.042	8.72218
1444606_at	13637	Efna2	ephrin A2	NM_007909	3.85933e-05	3.53237e-06	1.68307			218.556	16.2448	210.488	13.0016	294.71	66.9165	388.789	12.623	354.965	26.3915	450.4	11.1574	218.486	17.7061	221.745	10.4392	256.594	10.6706	241.069	12.9679
1418777_at	20300	Ccl25	chemokine (C-C motif) ligand 25	NM_009138 /// NR_033527 /// XM_006508736 /// XM_006508737 /// XM_006508738 /// XM_00650	0.000738836	1.48887e-05	1.672			101.654	8.10857	106.204	2.73085	103.734	18.7324	184.877	14.464	170.777	19.5975	183.95	19.787	103.957	7.84617	112.079	1.31367	103.933	11.1066	122.545	14.0769
1423635_at	12156	Bmp2	bone morphogenetic protein 2	NM_007553 /// XM_006498619	0.000285359	0.000101267	1.66688			14.731	3.61661	18.8643	2.61815	21.0774	0.484112	30.3918	1.34077	30.8949	2.27161	26.7052	2.34183	16.8973	0.701472	23.8852	3.73491	13.5183	0.404043	16.5207	1.86607
1452296_at	20564	Slit3	slit homolog 3 (Drosophila)	NM_011412	0.000585817	0.00229031	1.66022			64.6114	8.13152	63.4379	23.2642	51.5205	11.9239	77.0197	3.32781	72.0869	1.94555	75.8966	0.00213243	27.3021	2.92726	39.7926	1.31155	46.8265	1.35658	38.537	9.59884
1426431_at	16450	Jag2	jagged 2	NM_010588 /// XM_006515486 /// XM_006515487 /// XR_381478 /// XR_381479 /// XR_381480	1.76493e-06	1.66452e-05	1.65543			88.0361	3.07226	60.1965	3.40698	69.2036	5.66019	95.2854	11.4967	81.0304	1.70541	94.0405	0.771515	47.9851	3.52084	40.3793	2.27284	45.3869	2.62803	43.5374	8.20542
1457283_at	100042150	Nrg2	neuregulin 2	NM_001167891 /// XM_006525461 /// XM_006525462 /// XM_006525463 /// XM_006525464 /// XM	0.00671103	0.000589499	1.65186			29.3631	2.83017	29.6191	0.401574	32.1292	7.79305	45.4235	2.45723	40.7119	1.1724	47.4525	13.6213	24.667	0.938865	22.4462	2.49122	25.0701	3.24102	25.8845	4.38794

## Sheet: Fig 1H
Enriched in lateral NSCs
Column ID	Entrez Gene	Gene Symbol	Gene Title	RefSeq Transcript ID	p-value(Age - Cell Type - Region)	stepup(p-value(P4 latNSCs vs. P11 LatSVZ and P11 dSVZ and P4 LatSVZ and P4 LatTAPs and P4 dNSCs and P4 dSVZ and P4 dTAPs and P8 LatSVZ and P8 dSVZ))	Fold-Change(P4 latNSCs vs. P11 LatSVZ and P11 dSVZ and P4 LatSVZ and P4 LatTAPs and P4 dNSCs and P4 dSVZ and P4 dTAPs and P8 LatSVZ and P8 dSVZ)		Anti log expression values + SD	P11 Dorsal SVZ	P11 Dorsal SVZ SD	P8 Dorsal SVZ	P8 Dorsal SVZ SD	P4 Dorsal SVZ	P4 Dorsal SVZ SD	P11 Lateral SVZ	P11 Lateral SVZ SD	P8 Lateral SVZ	P8 Lateral SVZ SD	P4 Lateral SVZ	P4 Lateral SVZ SD	P4 Dorsal NSCs	P4 Dorsal NSCs SD	P4 Dorsal TAPs	P4 Dorsal TAPs SD	P4 Lateral NSCs	P4 Lateral NSCs SD	P4 Lateral TAPs	P4 Lateral TAPs SD
1441903_x_at	210029	Metrnl	meteorin, glial cell differentiation regulator-like	NM_144797	8.48854e-09	7.11975e-07	2.12248			17.0122	1.19392	16.1545	0.567257	21.4598	1.21056	15.2012	1.59175	18.959	1.10684	15.3948	1.14491	23.6645	1.31895	35.7665	0.357772	45.2497	0.0268607	41.8631	7.25577
1436791_at	22418	Wnt5a	wingless-type MMTV integration site family, member 5A	NM_001256224 /// NM_009524 /// XM_006518923 /// XM_006518924 /// XM_006518925 /// XM_00	9.35588e-07	5.3742e-05	1.9185			47.2406	1.37586	47.9916	8.89604	50.5054	4.38182	69.7188	7.70281	69.6952	1.68645	57.5874	8.72284	54.1698	9.8159	26.4081	0.370769	103.636	10.0266	86.8766	12.6963
1435747_at	14169	Fgf14	fibroblast growth factor 14	NM_010201 /// NM_207667 /// XM_006518548 /// XM_006518549	5.59949e-06	0.000923521	1.83246			31.7721	15.8054	47.8698	1.50262	34.7812	2.78152	93.6889	0.35371	94.6708	3.64148	77.5503	6.97795	35.1579	2.02593	36.7516	5.05379	91.6944	5.59252	44.8369	0.855771
1438767_at	18413	Osm	oncostatin M	NM_001013365	1.98698e-05	1.81593e-05	1.74851			116.453	13.7335	116.139	22.5515	139.719	13.8197	96.4703	0.991143	81.8649	1.57658	95.856	5.07159	134.72	13.5016	96.3411	2.0853	187.148	25.3117	97.2979	6.05754
1426073_at	65960	Twsg1	twisted gastrulation homolog 1 (Drosophila)	NM_023053	0.000283423	0.000263094	1.67658			34.7036	5.53538	32.8953	7.31835	40.456	1.33503	29.0021	0.895614	28.0241	2.41228	35.1692	5.48314	47.3868	5.30921	39.146	2.19625	61.1224	8.50001	46.0786	4.38385
Enriched in lateral TAPs
Column ID	Entrez Gene	Gene Symbol	Gene Title	RefSeq Transcript ID	p-value(Age - Cell Type - Region)	stepup(p-value(P4 LatTAPs vs. P11 LatSVZ and P11 dSVZ and P4 LatSVZ and P4 dNSCs and P4 dSVZ and P4 dTAPs and P4 latNSCs and P8 LatSVZ and P8 dSVZ))	Fold-Change(P4 LatTAPs vs. P11 LatSVZ and P11 dSVZ and P4 LatSVZ and P4 dNSCs and P4 dSVZ and P4 dTAPs and P4 latNSCs and P8 LatSVZ and P8 dSVZ)		Anti log expression values + SD	P11 Dorsal SVZ	P11 Dorsal SVZ SD	P8 Dorsal SVZ	P8 Dorsal SVZ SD	P4 Dorsal SVZ	P4 Dorsal SVZ SD	P11 Lateral SVZ	P11 Lateral SVZ SD	P8 Lateral SVZ	P8 Lateral SVZ SD	P4 Lateral SVZ	P4 Lateral SVZ SD	P4 Dorsal NSCs	P4 Dorsal NSCs SD	P4 Dorsal TAPs	P4 Dorsal TAPs SD	P4 Lateral NSCs	P4 Lateral NSCs SD	P4 Lateral TAPs	P4 Lateral TAPs SD
1424495_a_at	75458	Cklf	chemokine-like factor	NM_001037840 /// NM_001037841 /// NM_001286383 /// NM_029295 /// NM_029313 /// NR_10443	6.5945e-05	9.40001e-05	1.70461			130.248	3.17818	107.546	4.91744	174.803	50.4875	184.321	25.6016	170.319	0.727931	214.901	6.19098	230.107	8.87457	172.085	16.2949	242.176	65.8293	307.788	26.8179
1419638_at	13642	Efnb2	ephrin B2	NM_010111 /// XM_006508694	4.46551e-08	2.30693e-05	1.66481			317.872	0.436245	353.027	42.8185	592.386	108.946	534.37	12.0425	554.378	19.231	567.724	49.0023	910.428	77.2583	838.986	53.4002	1124.6	61.8448	984.857	133.963
1451374_x_at	75458	Cklf	chemokine-like factor	NM_001037840 /// NM_001037841 /// NM_001286383 /// NM_029295 /// NM_029313 /// NR_10443	5.90733e-05	5.103e-05	1.68653			104.209	1.86038	82.6287	21.5337	122.201	12.1985	110.276	7.43853	98.6211	0.692061	136.088	1.54932	139.414	2.88525	106.023	11.5835	135.309	10.3254	176.584	3.09143
1441316_at	22423	Wnt8b	wingless-type MMTV integration site family, member 8B	NM_011720	0.00891419	0.00172774	1.65324			28.3723	2.98188	18.9552	7.98015	20.9063	0.54044	14.7678	0.544942	16.8139	5.79363	15.6257	1.36507	24.1128	2.59513	26.8783	3.80237	24.2843	2.33767	30.9841	4.71162

## Sheet: Fig 2B
Dorsalising small molecules
Drugs	correl	significance	numbers of target genes		www.DrugBank.ca www.genome.jp/kegg/drug/ insilico.charite.de/ www.pharmgkb.org stitch.embl.de/	targets	Go Targets 1	Go Targets 1	additional enzymes
GW-8510	0.12	2.07	1367.4		cell cycle inhibitor	Cdk2 inhibitor	Cell cycle
ciclopirox	0.17	2.01	475.2		Antifungal Agents	binder of Sodium/potassium-transporting ATPase subunit alpha-1????/ hypoxia-inducible factor prolyl-4-hydroxylase	Signaling	Gene regulation/Cell cycle
AR-A014418	0.24	2.45	455.8		Kinase inhibitor	GSK3beta	Signaling
oxprenolol	0.22	2.34	366.3		Anti-Anxiety / Antihypertensive / Sympatholytics / Anti-Arrhythmia / Vasodilator agent / Adrenergic beta-Antagonists	Beta-1/2 adrenergic receptor inhibitor	Receptor antagonist		Cytochrome P450 2D6
streptomycin	0.28	2.54	356.9		Aminoglycosides antibiotic	Protein-arginine deiminase type-4	epigenetic
cinchonine	0.22	2.33	353.1		local anesthetic	Sodium channels; calmodulin	Receptor antagonist	Signaling
alfaxalone	0.42	3.79	322.5		a neuroactive steroid and general anaesthetic	directly activates and potentiates GABAA receptor-activated membrane current (IGABA). It acts as a positive allosteric modulator of the GABAA receptor; anesthetic. The alpha subunit subtype of GABAA determines the efficacy, but not the potency, of AFX neuroactive steroid to potentiate IGABA.	Receptor agonist
caffeic_acid	0.33	2.87	322.5		anti-oxidant / immunomodulation and anti-inflammatory activities	NfkB	Gene regulation	Signaling
oxytetracycline	0.28	2.45	322.5		A tetracycline analog used in a wide variety of clinical conditions	Inhibitor of Solute carrier family 22 member 6, Solute carrier family 22 member 8, Solute carrier family 22 member 11, Solute carrier family 22 member 7	Receptor antagonist
azaperone	0.4	3.45	301		neuroleptic drug with sedative andantiemetic effects	a dopamine antagonist but also has some antihistaminic and anticholinergic properties	Receptor antagonist
monensin	0.22	2.56	282		a polyether antibiotic / antifungal / antimicrobial	Protein transport inhibitor/Signaling	Protein transport inhibitor	Signaling
bumetanide	0.23	2.1	267.3		Diuretics; Sodium Potassium Chloride Symporter Inhibitors	Solute carrier family 12 member 1/2/4/5; Cystic fibrosis transmembrane conductance regulator;	Receptor antagonist		inducer Prostaglandin G/H synthase 2
acemetacin	0.25	2.27	264		non-steroidal anti-inflammatory drug	Inhibitor of Prostaglandin G/H synthase 1, Prostaglandin G/H synthase 2, Phospholipase A2, membrane associated, Prostaglandin reductase 2; activator of Peroxisome proliferator-activated receptor gamma, inhibitor of Lactoylglutathione lyase, Prostaglandin D2 receptor 2, activator of Peroxisome proliferator-activated receptor alpha,	Metabolism	Signaling, Gene regulation	inhibitor of cyclooxygenase
isoflupredone	0.22	2.40	251		Glucocorticoid	Glucocorticoid receptor	Gene regulation
methotrexate	0.27	2.33	250.8		An antineoplastic antimetabolite with immunosuppressant properties	inhibits Dihydrofolate reductase	Translation	Metabolism/Cell Cycle	Aldehyde oxidase; Methylenetetrahydrofolate reductase…
clonidine	0.27	2.06	249.4		Antihypertensive Agents / Sympatholytics / Analgesics / Adrenergic alpha-2 Receptor Agonists	Adrenergic receptors	Receptor agonist		Cytochrome P450 proteins
thioperamide	0.32	3.37	238		a potent HRH4 antagonist and selective HRH3 antagonist capable of crossing the blood–brain barrier	Histamine receptors	Receptor antagonist
methyldopate	0.38	2.82	223.6		An alpha-2 adrenergic agonist that has both central and peripheral nervous system effects. Its primary clinical use is as an antihypertensive agent	agonist Alpha-2A adrenergic receptor	Receptor agonist		inhibition of the decarboxylation of dihydroxyphenylalanine (dopa)—the precursor of norepinephrine—and of 5-hydroxytryptophan (5-HTP)—the precursor of serotonin—in the CNS and in most peripheral tissues
fludrocortisone	0.32	3.21	216		A synthetic mineralocorticoid with anti-inflammatory activity	agonist Androgen, Mineralocorticoid and glucocorticoid receptor	Gene regulation
atractyloside	0.33	3.28	211		a natural heteroglucoside that blocks mitochondrial ADP/ATP translocases	mitochondrial ADP/ATP translocases	Metabolism
hesperetin	0.29	2.8	209.3		cholesterol lowering flavanoid (may also have antioxidant, anti-inflammatory, anti-allergic, hypolipidemic, vasoprotective and anticarcinogenic actions).	Inhibitor of Microsomal triglyceride transfer protein large subunit, Sterol O-acyltransferase 1, Sterol O-acyltransferase 2	Metabolism
mefexamide	0.25	2.01	207.9		a psychostimulant	Unknown	Unknown
mephenesin	0.26	2.43	204.7		Muscle relaxant	NMDA receptor antagonist	Receptor antagonist
hymecromone	0.45	3.17	193.5		used as choleretic and antispasmodicdrugs and as a standard for the fluorometric determination of enzyme activity / Antineoplastic agent	??	Metabolism
eticlopride	0.3	2.67	176		selective dopamine antagonist that acts on dopamine receptor D2	dopamine receptor D2	Receptor antagonist
sulfamonomethoxine	0.25	2.20	174		antibiotic, antibacterial agent		Unknown
vigabatrin	0.29	2.55	172		irreversible inhibitor of 4-aminobutyrate transaminase, the enzyme responsible for the catabolism of gamma-aminobutyric acid	agonist GABA B receptor subunit 1	Receptor agonist
iohexol	0.28	2.41	165		non-ionic, water-soluble contrast agent	??	Unknown
dihydroergocristine	0.28	2.42	161		Nootropic Agents / Vasodilator Agents / Adrenergic alpha-Antagonists/direct inhibitor of γ-secretase		Signaling	Receptor agonist
ambroxol	0.28	2.38	161		Ambroxol is a secretolytic agent used in the treatment of respiratory diseases associated with viscid or excessive mucus. It is the active ingredient of Mucosolvan, Lasolvan or Mucoangin. The substance is a mucoactive drug with several properties including secretolytic and secretomotoric actions that restore the physiological clearance mechanisms of the respiratory tract which play an important r…	receptor antagonist	Receptor antagonist
diazoxide	0.56	3.67	154.8		benzothiadiazine derivative that is a peripheral vasodilator used for hypertensive emergencies	ATP-sensitive inward rectifier potassium channel 11; Carbonic anhydrase 1 and 2; Sodium/potassium-transporting ATPase subunit alpha-1; Calcium-activated potassium channel subunit alpha-1; Solute carrier family 12 member 3	Receptor agonist	Metabolism	inhibits Glutamine synthetase
meteneprost	0.45	3.88	150		A synthetic prostaglandin E analog that protects the gastric mucosa, prevents ulceration, and promotes the healing of peptic ulcers	??	Gene regulation
leflunomide	0.28	2.34	150		a pyrimidine synthesis inhibitor	antagonist Protein-tyrosine kinase 2-beta, inhibitor of Dihydroorotate dehydrogenas, agonist of Aryl hydrocarbon receptor	Metabolism	Gene regulation/Signaling	Cytochrome P450 proteins
ribavirin	0.28	2.33	150		A nucleoside antimetabolite antiviral agent	Inosine-5'-monophosphate dehydrogenase 1 inhibitor, Adenosine kinase agonist, Cytosolic purine 5'-nucleotidase agonist, Ectonucleotide pyrophosphatase/phosphodiesterase family member 1 inhibitor	Metabolism
sulfadimidine	0.33	2.22	145.2		a sulfonamide antibacterial		Unknown
celecoxib	0.32	2.15	145.2	important to state in text	non-steroidal anti-inflammatory drug (NSAID)	inhibits Prostaglandin G/H synthase 2; 3-phosphoinositide-dependent protein kinase 1	Signaling		Cytochrome P450 proteins
guanadrel	0.29	2.34	143		a postganglionic adrenergic blocking agen	agonist Sodium-dependent noradrenaline transporter	Receptor antagonist
levobunolol	0.32	2.41	125		A nonselective beta-adrenoceptor antagonist	Adrenergic receptors	Receptor antagonist
chloropyrazine	0.43	3.29	121			Cyclin-dependent kinase 2	Cell cycle
lovastatin	0.34	2.54	121		A cholesterol-lowering agent / Hydroxymethylglutaryl-CoA Reductase Inhibitors	Histone deacetylase 2	Epigenetic	Metabolism	Cytochrome P450 proteins
rilmenidine	0.32	2.35	117		treatment of hypertension	shows greater selectivity for imidazoline receptors than for cerebral alpha2-adrenergic receptors	Receptor antagonist
nitrofural	0.29	2.12	117		topical antibacterial agent		Unknown
Prestwick-857	0.45	3.40	114		??		Unknown
harpagoside	0.31	2.19	112		active ingredient of the plant devil’s claw. It inhibits NF-κB activation (a protein complex that controls transcription of DNA), suppresses lipopolysaccharide-induced iNOS, and inhibits COX-2 expression		Signaling	Gene regulation
tolnaftate	0.35	2.43	106	PMID: 20434536	synthetic over-the-counter anti-fungal agent/ Shh inhibitor	Smoothened	Signaling	Gene regulation
podophyllotoxin	0.22	2.45	275		used to treat warts and keratoses, and may have antineoplastic properties, as do some of its congeners and derivatives.	epigenetic, cytoskeletal	Epigenetic	Cytoskeletal
tranexamic acid	0.24	2.47	233		Antifibrinolytic Agents	Plasminogen inhibitor	Receptor agonist	Signaling
heptaminol	0.22	2.13	209		Heptaminol is an amino alcohol that has been used as a myocardial stimulant and vasodilator and to relieve bronchospasm. Its most common therapeutic use iHeptaminol is an amino alcohol that has been used as a myocardial stimulant and vasodilator and to relieve bronchospasm. Its most common therapeutic use is in orthostatic hypotension. The mechanism of heptaminol's therapeutic actions is not well…	Metabolism/signaling	Metabolism	Signaling
clorsulon	0.25	2.25	172		anti-parasite	Unknown	Unknown

## Sheet: Fig 2C
Ventralising small molecules
Drugs	correl	significance	numbers of target genes		www.DrugBank.ca www.genome.jp/kegg/drug/ insilico.charite.de/ www.pharmgkb.org stitch.embl.de/	targets	Go Targets 1	Go Targets 2
verteporfin	0.17	2.46	735		Verteporfin, otherwise known as benzoporphyrin derivative (trade name Visudyne®), is a medication used as a photosensitizer for photodynamic therapy to eliminate the abnormal blood vessels in the eye associated with conditions such as the wet form of macular degeneration. Verteporfin accumulates in these abnormal blood vessels and, when stimulated by nonthermal red light with a wavelength of 693 …		Gene regulation	Signaling
cephaeline	0.19	2.93	598		Anti-Bacterial Agents	inhbitionH+, K(+)-ATPase activity	Receptor antagonist
terfenadine	0.19	2.1	452		Histamine Antagonists/Anti-Arrhythmia Agents	Inhibitor of Histamine H1 receptor, Potassium voltage-gated channel subfamily H member 2, Muscarinic acetylcholine receptor M1-M5.	Receptor antagonist
prenylamine	0.19	2.12	420		Adrenergic Agents/Vasodilator Agents/Calcium Channel Blockers	modulator of Calmodulin, Myosin light chain kinase 2, skeletal/cardiac muscle	Signaling	Receptor
3-nitropropionic_acid	0.2	2.12	396		Mycotoxin/potent mitochondrial inhibitor	succinate dehydrogenase/ others unknown	Metabolism	Signaling
abamectin	0.26	2.61	361		insecticide/acaricide/nematicide	GABA Receptor mimetic	Receptor agonist
rescinnamine	0.22	2.2	354		Angiotensin-converting enzyme inhibitor used as an antihypertensive drug	inhibitor of Angiotensin-converting enzyme	Peptidase activity	Signaling
etanidazole	0.22	2.18	336		Antiprotozoal Agents / Anti-Infective Agents	binds Nucleotides/ inhibits glutathione S-transferase	Metabolism
dicycloverine	0.29	2.65	284		Muscarinic Antagonists / antispasmodic	Muscarinic acetylcholine receptor M1/M2	Receptor antagonists
5707885	0.29	3	263		Unknown	Unknown	Unknown
kanamycin	0.24	2.11	259		Anti-Bacterial Agents / Protein Synthesis Inhibitors	Unknown	Unknown
piperacetazine	0.21	2	238		antipsychotic prodrug /	Unknown	Unknown
gallamine_triethiodide	0.31	2.54	235		Neuromuscular Nondepolarizing Agents / Muscle Relaxant	Inhibitors of Muscarinic acetylcholine receptor M2 / Acetylcholinesterase / Neuronal acetylcholine receptor subunit alpha-2	Receptor antagonist
latamoxef	0.3	2.89	233		Anti-Bacterial Agents	Unknown	Unknown
picotamide	0.27	2.14	217		Component of the coenzyme NAD	NAD-dependent protein deacylase sirtuin-5, mitochondrial; ADP-ribosyl cyclase 2; Exotoxin A; L-lactate dehydrogenase A chain; Poly [ADP-ribose] polymerase 1	Epigenetic	Gene regulation/Metabolism
azacyclonol	0.39	3.57	200		atypical antipsychotics	tend to block receptors in the brain's dopamine pathways	Receptor antagonist
cinchocaine	0.25	2.24	200		Anesthetics, Local	Inhibitor of Sodium channel protein type 5 subunit alpha; Sodium channel protein type 10 subunit alpha; Calmodulin	Receptor antagonist	Signaling
disulfiram	0.25	2.26	198		Alcohol Deterrents	inhibits aldehyde dehydrogenase; Dopamine beta-hydroxylase/ retinoic acid synthesis, inhibitor of proteasome/NF-κB pathway	Metabolic/Gene regulation	Antioxidative
PF-00562151-00	0.29	2.15	196		Unknown	Unknown	Unknown
alpha-yohimbine	0.35	3.19	193			Mydriatic, Adrenergic alpha-2 Receptor Antagonists	Receptor antagonist
neomycin	0.27	2.28	183		Aminoglycosides / Antibiotics; neomycin inhibits the veratridine-stimulated release in cortical slices	binds phosphoinositides, inhibits the potassium-induced release	Signaling
oxaprozin	0.37	3.13	170		Anti-Inflammatory Agents, Non-Steroidal	Prostaglandin G/H synthase 1/2	Metabolism
gabapentin	0.27	2.25	168		Anti-Anxiety Agents / Antiparkinson Agents / Analgesics / Anticonvulsants / Calcium Channel Blockers / Antimanic Agents / Excitatory Amino Acid Antagonists	Unknown effect on Glutamate receptor ionotropic, NMDA 1, 2A, 2B, 2C, 2D, 3A, 3B; Agonist of Adenosine receptor A1; Inhibitor of Voltage-dependent calcium channel subunit alpha-2/delta-1, voltage-dependent calcium channel subunit alpha-2/delta-2 and Voltage-dependent N-type calcium channel subunit alpha-1B	Receptor agonist	Receptor Antagonist
tamoxifen	0.37	2.61	165		Antineoplastic Agents, Hormonal / Bone Density Conservation Agents / Estrogen Antagonists / Selective Estrogen Receptor Modulators	antagonist and agonist of Estrogen receptor, Estrogen receptor beta; unknown effect on 3-beta-hydroxysteroid-Delta(8),Delta(7)-isomerase and protein kinase C	Signaling	Metabolism/Gene regulation
cyanocobalamin	0.32	2.15	158		Vitamin B12 / Anti-anemic Agents	Cofactor of Methionine synthase; Methylmalonyl-CoA mutase, mitochondrial; Methionine synthase reductase; Methylmalonic aciduria type A/C protein, mitochondrial; Methylenetetrahydrofolate reductase	Metabolism	Epigenetic
meprylcaine	0.41	2.81	154		Anesthetics, Local	sodium channel blocker	Receptor antagonist
probucol	0.4	2.63	147		Antioxidants / Anticholesteremic Agents	inhibitor of ATP-binding cassette sub-family A member 1; unknown effect on Liver carboxylesterase 1	Metabolism
N-acetyl-L-aspartic_acid	0.4	2.63	147		Mast Cell Stabilizers (use in patients with allergic conjunctivitis)	Unknown actions on NAPQI (N-acetyl-p-benzoquinone imine), Aminoacylase-1,	Receptor agonist	Gene regulation/Metabolism
pirenzepine	0.27	2.01	143		Muscarinic Antagonists / Antispasmodics; Anti-Ulcer Agents	inhibitor of Inhibitor of nuclear factor kappa-B kinase subunit alpha, Inhibitor of nuclear factor kappa-B kinase subunit beta, activator of Glutathione synthetase, Cystine/glutamate , activator of Glutamate receptor ionotropic, NMDA 2B/1/2A/2D/3A
theobromine	0.37	2.39	140		bronchodilator / vasodilator	inhibitor of Adenosine receptor A1, Adenosine receptor A2a, cAMP-specific 3',5'-cyclic phosphodiesterase 4B	Receptor antagonist	Metabolism
cyproheptadine	0.28	2.01	133		Histamine H1 Antagonists / Anti-Allergic Agents / Serotonin Antagonists / Antipurinitics	inhibitor of Histamine H1 receptor, 5-hydroxytryptamine receptor 2A, 5-hydroxytryptamine receptor 2C, Muscarinic acetylcholine receptor M1/M2/M3	Receptor antagonist
flavoxate	0.29	2.08	130		Parasympatholytics	Muscarinic acetylcholine receptor M1 / M2	Receptor antagonist
hydroflumethiazide	0.45	2.58	109		Antihypertensive Agents / Diuretics / Sodium Chloride Symporter Inhibitors	Solute carrier family 12 member 1; Carbonic anhydrase 1 / 2 / 4 / 9 / 12; Sodium/potassium-transporting ATPase subunit alpha-1; Calcium-activated potassium channel subunit alpha-1	Receptor antagonist	Metabolism
carisoprodol	0.43	2.89	108		Muscle Relaxants, Central / Neuromuscular Agents	α1β2γ2 GABA receptor modulator	Receptor agonist
triprolidine	0.32	2.07	105		histamine H1 antagonist used in allergic rhinitis; asthma; and urticaria	Histamine H1 receptor inhibitor	Receptor antagonist
diethylcarbamazine	0.51	2.17	63		Lipoxygenase Inhibitors / Filaricides	Arachidonate 5-lipoxygenase; Prostaglandin G/H synthase 1	Metabolism
lycorine	0.57	7.04	271		toxic crystalline alkaloid	inhibitor of Acetylcholinesterase, Cholinesterase; Modulator of Acetylcholine receptor subunit alpha, Acetylcholine receptor subunit beta, Acetylcholine receptor subunit delta, Acetylcholine receptor subunit gamma, Acetylcholine receptor subunit ipsilon, Neuronal acetylcholine receptor subunit alpha- 2 3 4 5 6 7 9 10, Neuronal acetylcholine receptor subunit beta-2 3 4.	Receptor antagonist	Receptor modulator
sulfadimethoxine	0.56	7.00	282		Anti-Infective Agents	used to treat many infections including treatment of respiratory, urinary tract, enteric, and soft tissue infections.	metabolic
hexetidine	0.58	6.74	233		A bactericidal and fungicidal antiseptic. It is used as a 0.1% mouthwash for local infections and oral hygiene.	unknown	Unknown
Prestwick-691	0.5	6.09	277		??		Unknown
nadolol	0.45	5.92	328		non-selective beta-adrenergic antagonist	Beta-1/2 adrenergic receptor	Receptor antagonist
adiphenine	0.38	5.91	475		Anesthetics, Local	inhibits nicotinic receptor	Receptor antagonist
strophanthidin	0.59	5.80	167		Enzyme Inhibitors / Cardiotonic Agents	inhibitor of the NA-K(+)-exchanging ATPas
anisomycin	0.43	5.76	354		antibiotic	60S ribosomal protein L10-like / L13a / L23 / L15 / L19 / L23a / L26-like 1 / L8 / L3 / L11; NHP2-like protein 1	Receptor antagonist
canadine	0.47	5.36	249		protoberberine alkaloid	calcium channel blocker.	Receptor antagonist
isometheptene	0.5	5.33	216		causes vasoconstriction. It is used for treating migraines and tension headaches	Alpha-1A adrenergic receptor; Synaptic vesicular amine transporter	Transport	Receptor Antagonist
viomycin	0.39	4.94	326		nonribosomal peptide antibiotics exhibiting anti-tuberculosis properties	70S ribosome	Translatiom
thiamphenicol	0.4	4.88	295		Thiamphenicol (also known as thiophenicol and dextrosulphenidol) is an antibiotic. It is the methyl-sulfonyl analogue of chloramphenicol and has a similar spectrum of activity, but is 2.5 to 5 times as potent.	Unknown	Translation
folic_acid	0.53	4.86	154		member of the vitamin B family that stimulates the hematopoietic system	Folate receptor beta / gamma	Receptor agonist	Transport
trihexyphenidyl	0.45	4.86	229		muscarinic antagonists used for treatment of parkinsonian disorders and drug-induced extrapyramidal movement disorders and as an antispasmodic	Muscarinic acetylcholine receptor M1 / M2 / M3 / M4 / M5	Receptor antagonist
cyclobenzaprine	0.52	4.68	150		skeletal muscle relaxant and a central nervous system (CNS) depressant. Cyclobenzaprine acts on the locus coeruleus where it results in increased norepinephrine release	antagonist 5-hydroxytryptamine receptor 2A	Receptor antagonist
sulmazole	0.46	4.68	205		cardiotonic drug	An antagonist at the adenosine A1 receptor; inhibitor that interferes with the action of a phosphoric diester hydrolase	Receptor antagonist
merbromin	0.44	4.66	216		a topical antiseptic	Inhibitor of SET7/9, SET8, SETD2, and EuHMTase1	Epigenetic
iloprost	0.49	4.62	167		a vasodilatator agent/ platelet aggregation inhibitor	Agonist of Prostacyclin receptor, Prostaglandin E2 receptor EP1 subtype, cAMP-specific 3',5'-cyclic phosphodiesterase 4A, cAMP-specific 3',5'-cyclic phosphodiesterase 4B, cAMP-specific 3',5'-cyclic phosphodiesterase 4C, cAMP-specific 3',5'-cyclic phosphodiesterase 4D	Signaling	Receptor agonist/Metabolism
isoniazid	0.51	4.61	152		Antibacterial agent used primarily as a tuberculostatic	Unknown	Unknown
Prestwick-692	0.37	4.56	306		an ester alkaloid drug isolated from Rauwolfia canescens (family Apocynaceae) with antipsychotic and antihypertensive properties that has been used for the control of high blood pressure and for the relief of psychotic behavior.	inhibitor of Synaptic vesicular amine transporter	Receptor antagonist
Chicago_Sky_Blue_6B	0.53	4.54	139		organic compound used as a dye; structurally related to glutamate, that is a potent and efficient competitive inhibitor of vesicular glutamate uptake.	unknown vesicular glutamate carrier	Transport
puromycin	0.38	4.48	275		antibiotic that is a protein synthesis inhibitor by inhibiting translation. It is toxic to prokaryotic and eukaryotic cells	inhibitor/modulator of Tau, puromycin-sensitive aminopeptidase (PSA)	Cytoskeletal
quinpirole	0.47	4.42	169		a psychoactive drug and research chemical which acts as a selective D2 and D3 receptor agonist	Dopaminergic receptors D2/D3 agonist	Receptor agonist
thiocolchicoside	0.34	2.6	158		is a muscle relaxant with anti-inflammatory and analgesiceffects	competitive GABAA receptor antagonist and also glycine receptor agonist with similarpotency and nicotinic acetylcholine receptors to a much lesser extent	Receptor agonist	Receptor Antagonist
pirenperone	0.32	2.23	147		antiserotonergic and antidopaminergic agent	5-HT2 receptors, Dopaminergic receptors	Receptor antagonist
harmol	0.3	2.01	145		Unknown	Cdk2	Cell Cycle
proadifen	0.33	2.08	139		Inhibitor of drug metabolism and CYTOCHROME P-450 ENZYME SYSTEM activity	Activator of GSK3b; inhibitor of the nicotinic acetylcholine receptor (NAChR) and muscarinic acetylcholine receptor (MAChR)	Signaling	Receptor Antagonist
etynodiol	0.38	2.19	133		A synthetic progestational hormone used alone or in combination with estrogens as an oral contraceptive	agonist Progesterone receptor; agonist Estrogen receptor	Signaling	Gene regulation

[truncated: 24 more sheets: Fig 2D, Fig 2E, Fig 3B, Fig 3C+D, Fig 4F, Fig 4G, Fig 4H, Fig 5B, Fig 5C+D, Fig 6A, Fig 6C, Fig 6E, Fig 7C, Fig 7D, Fig 7E, Fig 7F+G, S1A , S1B, S1D, S2 …]
