# Supplementary material for: Pharmacogenomic identification of small molecules for lineage specific manipulation of subventricular zone germinal activity
Source: PLoS Biol. 2017 Mar 28;15(3):e2000698. doi: 10.1371/journal.pbio.2000698 (PMC5370089; doi:10.1371/journal.pbio.2000698)
Supplement: S3 Table — Gene lists (isolated OL lineage cells at different stages of differentiation were compared against those of dNSCs+dTAPs (see Materials and Methods) were uploaded onto www.spied.org.uk to perform the CMAP small molecule analysis. Agents with a positive correlation have the ability to promote genes associated with the OL lineage, whereas those in the negative range have an anti-correlation (i.e. repressive effect) with the OL lineage. Small molecules are ranked according to the largest numbers of "target or perturbed genes". (XLSX) [file pbio.2000698.s008.xlsx]

## Sheet: S3 Table
Small molecule	correl	significance	numbers of target genes
trichostatin_A	0.17	9.7	3292
tanespimycin	0.06	3.39	2732
LY-294002	0.09	4.44	2296
vorinostat	0.2	9.58	2247
GW-8510	0.24	11	2093
camptothecin	0.21	9.24	1927
phenoxybenzamine	0.1	4.48	1871
H-7	0.19	8.33	1803
sirolimus	0.09	4	1783
irinotecan	0.22	9.46	1752
alsterpaullone	0.22	9.24	1729
apigenin	0.18	7.7	1724
0175029-0000	0.21	8.92	1711
medrysone	0.22	8.9	1635
thioguanosine	0.14	5.53	1591
8-azaguanine	0.19	7.48	1579
luteolin	0.17	6.79	1574
valproic_acid	0.22	8.72	1523
thioridazine	0.19	7.53	1500
phthalylsulfathiazole	0.17	6.45	1493
meticrane	0.12	4.65	1443
doxorubicin	0.23	8.93	1438
azacitidine	0.12	4.44	1434
sulconazole	0.2	7.56	1369
daunorubicin	0.25	9.35	1360
tretinoin	0.13	4.92	1357
scriptaid	0.16	5.8	1348
rottlerin	0.14	5.05	1285
withaferin_A	0.18	6.6	1283
bisacodyl	0.16	5.69	1280
15-delta_prostaglandin_J2	0.12	4.3	1278
thiostrepton	0.18	6.6	1276
ellipticine	0.2	7.4	1275
rifabutin	0.17	5.89	1245
harmine	0.08	2.95	1222
trifluoperazine	0.22	7.68	1219
alpha-estradiol	0.13	4.38	1211
rimexolone	0.17	5.94	1205
prochlorperazine	0.17	6.06	1193
ginkgolide_A	0.17	6.07	1191
doxazosin	0.15	5.31	1189
wortmannin	0.12	4.13	1189
levonorgestrel	0.13	4.63	1184
chrysin	0.13	4.4	1142
trioxysalen	0.12	4.04	1140
resveratrol	0.29	9.94	1138
N-acetyl-L-leucine	0.14	4.85	1122
repaglinide	0.24	8.02	1121
Prestwick-1084	0.12	3.86	1120
gliclazide	0.14	4.79	1117
mitoxantrone	0.27	9.13	1101
hexestrol	0.14	4.55	1097
parthenolide	0.15	4.98	1095
tyloxapol	0.19	6.4	1082
0297417-0002B	0.18	5.95	1069
propylthiouracil	0.18	6.02	1068
mebendazole	0.13	4.15	1053
carbachol	0.16	5.2	1044
dequalinium_chloride	0.07	2.34	1020
chlorpromazine	0.18	5.69	1019
norcyclobenzaprine	0.23	7.57	1016
omeprazole	0.12	3.82	1015
skimmianine	0.15	4.76	1013
estriol	0.13	4.28	1011
morantel	0.1	3.11	1007
adiphenine	-0.15	6.22	1770
anisomycin	-0.11	4.01	1378
helveticoside	-0.08	3.08	1361
lanatoside_C	-0.1	3.58	1334
viomycin	-0.12	4.17	1163
podophyllotoxin	-0.12	3.97	1079
thiamphenicol	-0.18	5.87	1032
biperiden	-0.11	3.35	1010
sulfadimethoxine	-0.08	2.45	975
etiocholanolone	-0.1	2.99	958
chenodeoxycholic_acid	-0.08	2.41	927
timolol	-0.11	3.29	894
felbinac	-0.1	2.94	832
securinine	-0.1	2.79	783
metronidazole	-0.11	3.13	780
iohexol	-0.09	2.39	773
harmol	-0.09	2.45	755
ambroxol	-0.11	2.86	711
isometheptene	-0.11	2.91	706
atracurium_besilate	-0.09	2.35	697
NS-398	-0.1	2.7	684
oxybenzone	-0.11	2.71	658
bacitracin	-0.1	2.38	610
vincamine	-0.1	2.38	559
