# Supplementary material for: Pharmacogenomic identification of small molecules for lineage specific manipulation of subventricular zone germinal activity
Source: PLoS Biol. 2017 Mar 28;15(3):e2000698. doi: 10.1371/journal.pbio.2000698 (PMC5370089; doi:10.1371/journal.pbio.2000698)
Supplement: S4 Table — Gene lists (dNSCs+vNSCs versus adult NSCs (see Materials and Methods) were uploaded onto www.spied.org.uk to perform the CMAP small molecule analysis. Agents with a positive correlation have the ability to promote genes associated with earlier NSCs, whereas those in the negative range have an anti-correlation (i.e. repressive effect) on earlier NSCs phenotypes. Small molecules are ranked according to the largest numbers of "target or perturbed genes". (XLSX) [file pbio.2000698.s009.xlsx]

## Sheet: S4 Table
Small molecule	correl	significance	numbers of target genes
adiphenine	0.27	8.73	1227
helveticoside	0.19	5.24	1157
thapsigargin	0.14	4.11	1070
AR-A014418	0.2	4.03	998
anisomycin	0.21	6.25	989
lanatoside_C	0.17	4.52	865
viomycin	0.28	7.34	776
monensin	0.25	6.44	762
nadolol	0.32	8.45	761
podophyllotoxin	0.32	8.24	757
thiamphenicol	0.36	9.24	714
lycorine	0.41	10.54	703
levomepromazine	0.21	5.04	636
sulfadimethoxine	0.28	6.79	629
chenodeoxycholic_acid	0.25	5.98	629
timolol	0.19	4.42	589
thioperamide	0.29	6.97	585
etiocholanolon	0.15	3.42	585
lasalocid	0.13	3.09	583
biperiden	0.24	5.62	581
tranexamic_acid	0.34	7.99	579
heptaminol	0.25	5.76	570
Prestwick-692	0.27	6.14	561
isoflupredone	0.35	8.09	551
naringenin	0.25	5.61	543
atractyloside	0.34	7.77	542
3-acetamidocoumarin	0.3	6.87	539
Prestwick-1082	0.17	3.87	536
trihexyphenidyl	0.38	8.76	503
SC-560	0.26	5.85	503
calcium_folinate	0.25	5.54	495
diphenhydramine	0.3	6.55	489
gentamicin	0.2	4.22	480
canadine	0.16	3.46	479
cinchonine	0.36	7.93	476
valinomycin	0.18	3.87	475
Prestwick-691	0.14	3.02	471
metronidazole	0.21	4.5	470
ambroxol	0.15	3.11	461
finasteride	0.26	5.54	460
felbinac	0.24	5.13	459
Prestwick-642	0.2	4.14	459
PHA-00745360	0.27	5.71	450
clorsulon	0.39	8.49	448
terazosin	0.28	5.94	448
fludrocortisone	0.25	5.35	448
isometheptene	0.3	6.44	445
lisuride	0.37	7.82	441
securinine	0.19	4.01	440
Prestwick-1103	0.27	5.59	437
ribavirin	0.15	2.96	434
trimethobenzamide	0.42	9.14	432
merbromin	0.18	3.63	431
midodrine	0.17	3.5	429
diethylstilbestrol	0.22	4.38	417
Gly-His-Lys	0.36	7.39	414
sulmazole	0.36	7.54	413
sulfamonomethoxine	0.28	5.6	412
iopamidol	0.25	4.95	412
colistin	0.23	4.56	412
carbimazole	0.17	3.41	411
clemastine	0.19	3.74	406
pheneticillin	0.27	5.47	405
iohexol	0.21	4.21	404
iloprost	0.28	5.59	400
chloropyrazine	0.18	3.54	397
hexetidine	0.26	5.08	396
phenazone	0.18	3.59	394
vinblastine	0.17	3.35	394
vancomycin	0.27	5.27	384
iopromide	0.25	4.96	384
oxybenzone	0.19	3.71	381
bumetanide	0.15	2.77	380
guanabenz	0.27	5.23	373
pyrithyldione	0.22	4.12	371
trichostatin_A	-0.11	4.62	1825
vorinostat	-0.1	3.56	1233
GW-8510	-0.37	13.4	1198
camptothecin	-0.35	12.16	1106
phenoxybenzamine	-0.18	5.9	1061
alsterpaullone	-0.33	10.77	1008
H-7	-0.26	8.45	1000
apigenin	-0.33	10.63	991
irinotecan	-0.29	9.33	977
medrysone	-0.38	12.29	974
0175029-0000	-0.32	10.1	956
thioguanosine	-0.26	8.22	927
luteolin	-0.31	9.78	917
phthalylsulfathiazole	-0.26	7.98	893
8-azaguanine	-0.21	6.25	866
meticrane	-0.18	5.38	836
valproic_acid	-0.2	5.73	806
sulconazole	-0.25	7.12	798
daunorubicin	-0.41	12.22	796
doxorubicin	-0.35	10.42	794
azacitidine	-0.28	8.09	770
tretinoin	-0.2	5.5	758
rimexolone	-0.29	8.3	758
bisacodyl	-0.22	5.96	709
alpha-estradiol	-0.24	6.44	703
