# Supplementary material for: Pharmacogenomic identification of small molecules for lineage specific manipulation of subventricular zone germinal activity
Source: PLoS Biol. 2017 Mar 28;15(3):e2000698. doi: 10.1371/journal.pbio.2000698 (PMC5370089; doi:10.1371/journal.pbio.2000698)
Supplement: S5 Table — Uploaded gene list for generating list of drugs to perturb OLs from postnatal dNSCs/dTAPs were further analysed on the to provide a list of gene targets that are likely to be differentially affected. Also given are relative fold change intensity and p-values. (XLSX) [file pbio.2000698.s010.xlsx]

## Sheet: S5 Table
Gene Symbol	Intensity Fold Change	p-value
Aacs	1.57357	0.000546
Aadacl1	1.42628	6e-06
Aatk	1.77452	0.001231
Abat	1.47212	0.000109
Abca2	1.5864	0.00154
Abcb8	1.40201	0
Abcd2	-1.46358	0
Abhd12	1.44478	5.8e-05
Abhd3	1.70088	1.5e-05
Abhd5	1.47703	0.004106
Ablim2	1.33471	0.001074
Abtb2	1.40568	2.5e-05
Acaa2	-1.3498	0.002129
Acin1	-1.43997	0
Acot7	1.36037	0.009209
Acsl1	1.77474	0.000683
Acsl3	1.39209	0.000256
Acss2	1.6383	0.003137
Adamts4	1.9442	0.000999
Add1	1.47876	8.1e-05
Add3	1.48458	0
Adora1	1.6991	0.005353
Adssl1	1.87816	0.038708
Afap1L1	1.39723	0.007544
Aff2	-1.44344	2e-06
Agpat3	1.37309	2e-06
Agpat4	1.58115	0.000179
Ahctf1	-1.3803	0.000315
Aig1	1.50956	0
Akna	-1.41169	2e-06
Aldh1A1	1.49039	0.000228
Aldh3B1	1.35967	0.000398
Aldoa	1.4906	5e-06
Alox5	1.62801	0.001163
Amot	-1.63744	0
Ank2	1.40313	0.000115
Ank3	1.82617	0.000634
Ankrd15	1.6871	1.2e-05
Anks1B	1.78153	0.000169
Antxr2	-1.35408	9e-06
Apbb1	1.47155	5.9e-05
Apitd1	-1.58978	0.00035
Aplp1	1.72547	0.001321
Apod	1.94453	0.027218
App	1.31619	0.000262
Arfgef1	-1.342	5e-06
Arhgap11A	-1.65393	1.5e-05
Arhgap29	1.32263	0.004454
Arhgef10	1.68585	0.000816
Arl2	1.50877	0.001537
Arl6Ip2	-1.47545	0
Arpc1A	1.39932	0.000135
Arpc1B	1.79497	0.000806
Arsb	1.57373	0.000433
Arsg	1.74026	0.037187
Asah2	1.53097	0.014561
Ascl1	-1.60425	0.000241
Aspa	1.9611	0.030627
Aspm	-1.84639	1e-06
Atad2	-1.79632	3.4e-05
Atad5	-1.68294	9.9e-05
Atp10B	1.5647	0.000175
Atp1A1	1.32487	3e-06
Atp6V0A2	1.42924	0.000109
Atp6V0B	1.38959	0
Atp8A1	1.62945	0.003729
Atp9A	1.60027	0
Atr	-1.4104	2e-06
Atrn	1.38723	2.8e-05
Atrx	-1.66389	0
Aurka	-1.58588	6e-06
Aurkb	-1.7917	2e-06
B3Galnt2	-1.49526	0.000565
B3Galt5	1.62635	0.029833
B3Gnt1	1.47829	0
B3Gnt2	1.57928	0.011711
B3Gnt5	-1.40946	0
Bace1	1.58397	9.3e-05
Bace2	1.83965	0.002628
Bach1	-1.4554	2e-06
Bcan	1.49369	0.001179
Bcl11A	-1.94098	0
Bcl11B	-1.65324	0
Bcl2L11	-1.37533	0
Bdh1	1.55729	7.6e-05
Bfsp2	1.858	0.001097
Bicd2	1.65228	4.9e-05
Bin1	1.74505	0.002281
Birc5	-1.62745	0
Blm	-1.38418	1.8e-05
Bmp4	1.42135	0.030033
Bpgm	1.32247	7.7e-05
Braf	-1.40575	0
Brunol4	-1.34811	0
Btg1	-1.48552	0
Bub1	-1.7731	1e-05
Bub1B	-1.70312	4e-06
Bub3	-1.42783	5e-06
Cacnb4	1.38717	0.000403
Cacng5	-1.31717	1.4e-05
Cadm2	1.42953	0.000359
Cald1	-1.38283	4e-06
Camta1	-1.4052	0
Capn5	1.84956	0.000277
Casc5	-1.79839	1.9e-05
Caskin2	1.53236	0.01167
Casp8Ap2	-1.3675	1e-06
Cav2	1.33149	0.041058
Cbs	-1.36857	0.028574
Ccdc80	-1.83177	0.029989
Ccdc88A	-1.34181	0.00041
Ccdc99	-1.73396	4.6e-05
Ccna2	-1.63634	0
Ccnb1	-1.62627	1e-06
Ccnb2	-1.5201	0
Ccnd2	-1.93058	0
Ccne2	-1.62133	5e-06
Ccny	-1.32502	1e-06
Ccnyl1	1.33807	0.00194
Cd44	-1.51009	0.002678
Cd82	1.5806	0.031204
Cdc20	-1.58785	3e-06
Cdc25A	-1.46277	5e-06
Cdc25C	-1.37472	0.000117
Cdc42Ep2	1.75281	0.01332
Cdc45L	-1.44965	1.1e-05
Cdc6	-1.78756	7.9e-05
Cdca2	-1.82629	1.7e-05
Cdca3	-1.5977	1e-06
Cdca4	-1.59446	0
Cdca5	-1.80395	1e-06
Cdca7	-1.92969	2e-05
Cdca7L	-1.45556	0.000103
Cdca8	-1.69601	0
Cdh11	1.49195	0.000119
Cdh13	1.51892	0.00292
Cdk6	-1.74164	0
Cdkl2	1.47143	0.001182
Cdon	-1.60711	0
Cds2	1.46795	0.003476
Cdt1	-1.80523	0
Celsr1	-1.48083	0.006184
Celsr3	-1.42315	0
Cend1	1.43493	1e-06
Cenpa	-1.58471	0
Cenpe	-1.87075	8e-05
Cenpf	-1.67816	9e-06
Cenph	-1.35045	1e-06
Cenpi	-1.4442	1e-06
Cenpj	-1.46441	7e-06
Cenpk	-1.62775	2.2e-05
Cenpl	-1.46096	0
Cenpp	-1.75051	0
Cep55	-1.76556	3e-06
Cep57	-1.40467	0
Cep70	-1.56738	0
Cep76	-1.35997	1.6e-05
Chaf1B	-1.33766	0
Chek1	-1.76388	1e-05
Chn2	1.82225	0.000767
Chst2	1.62032	0.000765
Chst5	1.46897	0.027449
Chst8	1.74463	0.004085
Cited2	-1.72297	0
Ckap2L	-1.4196	4.5e-05
Cks1B	-1.57479	0
Cks2	-1.68239	0
Clasp1	-1.61405	3e-06
Cldn11	1.96081	0.001747
Cldn14	1.70989	0.006612
Cldnd1	1.49955	0.004678
Clmn	1.80095	0.013568
Cln3	1.39329	0
Cln8	1.45856	5e-06
Clspn	-1.81709	2e-06
Cmtm5	1.84012	0.002526
Cnbp	-1.37958	0
Cnksr3	1.75065	0.001637
Cnp	1.91779	0.000549
Cntn1	1.76883	0
Cntn3	1.46611	0.036974
Cntnap2	-1.80926	0.049596
Cobll1	1.5123	2e-06
Col11A2	1.41973	2e-06
Col20A1	1.53707	0.000112
Col4A4	-1.34169	0.001508
Col9A1	1.34959	0.001905
Col9A3	1.62303	0.001191
Coro7	1.35817	0.002399
Cpm	1.89211	0.002965
Cpox	1.79414	0.001321
Cpsf6	-1.48784	9e-06
Crtac1	1.53266	0.003494
Cryab	1.93836	0.006925
Cryl1	1.44036	0
Csnk2A1	-1.39676	0.000292
Cspp1	-1.3673	0
Csrp2	-1.64564	0
Ctbp2	-1.40205	0
Ctdspl2	-1.33721	8.2e-05
Ctgf	-1.34268	0.034814
Cth	-1.4074	0.002099
Ctsa	1.3768	0.000105
Ctsf	1.38287	2e-06
Ctsk	1.68467	0.005706
Cugbp1	-1.51231	0
Cugbp2	-1.40178	0
Cxcl12	1.80301	0.024814
Cyp27A1	1.79881	0.00375
Cyp39A1	-1.42282	3.3e-05
Dapk1	-1.59081	0
Dapp1	-1.344	0.014631
Dbf4	-1.67867	0
Dbndd2	1.86128	0.005959
Dcc	-1.5251	0
Dclk1	-1.32414	1e-06
Dctn4	1.33071	0.001891
Dcx	-1.63772	0
Ddc	1.90551	0.001106
Ddn	1.43708	0
Ddx6	-1.35457	0
Degs1	1.63695	4.5e-05
Depdc6	1.5095	0.040974
Dgat2	1.64037	0.00024
Dgka	1.32493	3e-06
Dhcr24	1.60173	0.001082
Dhrs7	1.38367	0
Dip2A	1.51426	0.000288
Dixdc1	1.52597	0.001425
Dkk3	-1.33409	0.035984
Dleu7	-1.36098	0
Dlx1	-1.97251	0
Dlx2	-1.91473	8e-06
Dlx5	-1.83589	5e-06
Dmrta2	-1.4645	0
Dna2L	-1.54929	0
Dnaja4	1.3746	0.000148
Dnajc6	1.63818	0.029776
Dnm1	1.53082	2e-06
Dnm2	1.5247	0.000494
Dock10	1.53749	0.00211
Dock11	-1.31604	1.7e-05
Dock6	1.50802	0.000733
Dock7	-1.75419	0
Dock9	1.74179	3.5e-05
Dst	1.46882	7e-06
Dtl	-1.85131	2.4e-05
Dtx1	1.55758	0.010685
Dusp15	1.38762	0
Dusp3	1.53914	0.001109
Dusp4	-1.64813	0.000224
Dusp7	1.50397	0.000372
Dusp9	1.45919	0.015917
Dut	-1.37162	0
Dync1Li2	1.40843	1.7e-05
Dynll2	1.35408	0.002433
E2F7	-1.85391	1.9e-05
Ebp	1.46019	0.000532
Ect2	-1.71903	0
Edg2	1.91793	0.002124
Edg8	1.96639	0.001447
Efhd1	1.73024	0.043778
Efnb1	-1.3757	0.000229
Efnb2	-1.77092	0
Efnb3	1.64726	0.007066
Egflam	1.41411	0.011025
Egfr	-1.92429	0
Ehd3	1.40151	9.8e-05
Ehhadh	1.50305	0.001728
Eif2S2	-1.43728	7e-06
Ela1	1.62948	0.004496
Elavl2	-1.77885	0
Elavl4	-1.46951	0
Elf2	-1.41113	0
Ell2	1.85176	0.001652
Elovl1	1.83238	0.002208
Elovl2	-1.86776	0
Elovl4	1.36638	4e-06
Elovl7	1.92681	0.001087
Emilin2	1.64985	0.046686
Eml1	1.84281	0.000601
Emp1	-1.44092	0
Emp2	-1.35302	0.006548
Emx2	-1.46034	2.7e-05
Endod1	1.81822	0.010718
Enpp2	1.5479	1e-06
Enpp4	1.41717	0.004964
Enpp6	1.90619	0.002085
Entpd5	1.42431	0.000151
Eomes	-1.8835	0.027629
Ep400	-1.41617	1e-06
Epha3	-1.71798	0.009676
Epha4	-1.33657	0.000921
Epha7	-1.49862	0
Ephx1	1.43176	0.000399
Epn2	1.63859	0.004638
Erbb3	1.93906	0.000274
Ercc6L	-1.55503	7e-06
Esco2	-1.49557	0.000843
Etaa1	-1.5055	0
Evi2A	1.75277	0.012227
Exo1	-1.68581	0.000152
Fa2H	1.85869	0.001643
Faah	1.36226	8.2e-05
Fads1	-1.41854	0
Fads6	1.60954	0.001688
Fah	1.74813	0.007839
Farp2	1.50111	0.000551
Fas	-1.352	0
Fbln2	-1.44094	0.001406
Fbxo5	-1.86487	0
Fbxo7	1.36832	0.000197
Fem1C	-1.32148	0
Fezf2	-1.36551	0.002072
Fgf1	1.38781	0.035779
Fgfbp3	-1.59945	0.043474
Fgfr2	1.45853	0.004077
Fignl1	-1.51946	0.000173
Fkbp9	1.32814	0.000772
Flna	-1.35313	0
Fmn2	-1.33009	2.1e-05
Fmo1	-1.45589	0.049642
Fnbp1	1.5446	0.034223
Fnbp1L	-1.49003	0
Fnbp4	-1.42618	2e-06
Fosb	1.46628	0.031127
Foxg1	-1.67446	0
Foxp2	-1.40289	0
Fstl1	-1.7673	0.000378
Fubp1	-1.56318	2e-06
Fzd2	-1.50685	1e-06
Gab1	1.34892	1.9e-05
Gad2	-1.34965	0.000119
Gal3St1	1.83437	0
Galnt6	1.83629	0.012825
Gamt	1.87044	0.002581
Gas2L3	-1.76793	1e-05
Gatm	1.47065	0
Gba	1.39106	4.8e-05
Gfap	-1.62871	0.03942
Gfra1	1.55658	7e-06
Ghdc	1.39204	1e-06
Gins1	-1.61675	0
Gipc1	1.41573	0.001106
Gja1	-1.59873	0.028558
Gjb1	1.74534	0.024643
Gje1	1.81981	0.00158
Gli2	-1.76777	0
Gli3	-1.61952	2.4e-05
Glrb	1.58845	0.000139
Gltp	1.64422	7e-06
Gmnn	-1.39622	0
Gna12	1.42571	0.002872
Gnas	-1.4022	1.2e-05
Gnb4	1.52524	6.8e-05
Gng11	1.52538	0.045284
Gng12	1.53111	0.000297
Gng2	-1.33064	0
Gng4	1.58306	0.010426
Gng8	1.65796	0.014599
Gnptab	1.65203	0.001128
Golim4	-1.32534	0.000908
Gpc2	-1.43542	1e-06
Gpc4	-1.55857	4.8e-05
Gpc5	1.65489	0.012344
Gpld1	1.70728	0.016105
Gpr146	1.41649	0.000133
Gpr155	1.54805	0
Gpr176	1.75815	0.000924
Gpr177	1.64153	0.000253
Gpr37	1.96752	0.005924
Gpr37L1	1.5995	8.8e-05
Gpr62	1.96194	0.013115
Gprc5B	1.58055	0.023066
Gramd3	1.62432	0.002077
Grb10	-1.83662	0
Grb14	1.83516	0.00175
Grid2	1.4156	0
Grip1	-1.45517	0
Grm3	-1.63199	0.030368
Grm7	1.63881	1e-06
Gsg2	-1.58206	0
Gsn	1.94672	0.00881
Gspt1	-1.32441	0
Gss	1.61483	0.005653
Gsto1	1.43928	0.001915
Gsx2	-1.55689	4.4e-05
Gtpbp4	-1.40246	0
Gulp1	-1.56728	0.028841
H2Afv	-1.34294	0
Hdac11	1.63442	0.000405
Hells	-1.79075	5e-06
Hepacam	1.34683	0.003654
Hes5	-1.36714	1e-06
Hes6	-1.33132	0
Hhip	1.85766	0.003153
Hip1R	1.32993	0
Hirip3	-1.52612	1e-06
Hist1H2Ae	-1.83569	1e-06
Hmbox1	-1.42127	2.3e-05
Hmgb2	-1.60979	0
Hmgb3	-1.52951	0
Hmgcs1	1.44442	0.002347
Hmmr	-1.4546	2.5e-05
Hn1	-1.46546	0
Hnrnpr	-1.42881	2.8e-05
Hpcal4	1.35911	0.000212
Hrasls3	1.76963	0.036703
Hspa1A	1.483	0.000914
Hspa1B	1.69469	0.004754
Hspa2	1.74593	0.001104
Huwe1	-1.33965	1e-06
Ibtk	-1.32174	4.8e-05
Ick	1.46647	0.000746
Id4	-1.8201	0
Ifitm2	-1.52445	0.000658
Igf1R	-1.54646	0
Igf2Bp3	-1.5995	0
Igfbp2	-1.44518	0.008676
Igfbp5	-1.8109	2e-05
Igfbpl1	-1.87259	0.002608
Igsf8	1.39216	0.003419
Il12Rb1	1.53669	0.004884
Il1Rap	1.73298	0
Il23A	1.89159	0.000967
Ilf2	1.73263	0.000952
Ilvbl	1.41909	0.000368
Incenp	-1.54017	1e-06
Ing3	-1.33068	0
Inoc1	-1.38197	5e-06
Insc	1.62886	0.01135
Insm1	-1.85623	0
Iqcb1	-1.37711	0
Iqgap1	-1.51215	0
Itfg3	1.55708	0
Itgb7	1.35962	0.011003
Itih3	1.68258	0.016937
Itpr2	1.59946	0.001279
Jag1	-1.47514	0
Jam3	1.48952	1e-05
Jarid1A	-1.32246	3e-06
Jarid1C	-1.40142	1.2e-05
Josd2	1.80311	0.002181
Jub	-1.39082	0.000248
Kcna1	1.96491	0.00464
Kcna6	1.33236	5.3e-05
Kcne1L	-1.49085	0.001216
Kif11	-1.65719	7e-06
Kif18A	-1.7903	5e-06
Kif1B	1.61773	0.001756
Kif20A	-1.5584	4e-06
Kif22	-1.51997	1.2e-05
Kif23	-1.56289	4.1e-05
Kirrel3	1.38877	1e-06
Klhl2	1.5009	0.002344
Klhl4	1.94729	0.033275
Kndc1	1.94124	0.001011
Kntc1	-1.66814	5e-06
Kpna2	-1.31622	0
Lad1	1.5904	0.007193
Lamp2	1.61599	0.0005
Lancl3	-1.49907	0
Laptm4B	1.31482	0
Larp6	1.75617	0.008596
Lass1	1.4948	4.5e-05
Lass2	1.55352	0.003552
Ldlrap1	1.82516	0.004736
Lect1	1.85102	0.015177
Lgals1	-1.5598	0
Lgi3	1.84156	0.000522
Lhx2	-1.72272	0.000639
Lims2	1.50082	0.000616
Lin9	-1.46033	5e-06
Lingo2	1.59223	0.000648
Litaf	1.43865	0.028884
Lmbrd1	1.33159	2e-06
Lmna	1.46643	0.000348
Lmnb1	-1.55226	4.1e-05
Lmo3	-1.38709	2.3e-05
Loxl1	-1.66515	0.033682
Lrrc41	-1.57357	4.7e-05
Lsm8	-1.35362	0
Ltbp1	1.31699	0.008387
Luc7L	-1.52098	2.1e-05
Mad2L1	-1.38826	0
Mag	1.96225	0.001191
Magi1	-1.59617	0
Mal	1.99473	0.001881
Man1C1	1.31615	0.002464
Map6D1	1.88902	0.0007
Mapk3	1.38938	0.001563
Mapk8Ip1	1.44863	0.008974
Mapt	1.33157	0
Mar03	-1.33968	0
Mast3	1.56012	0.005656
Mastl	-1.5317	8.6e-05
Matn1	1.51351	0.0133
Matr3	-1.53908	8e-06
Mbnl2	1.67989	0.001001
Mbp	1.97889	0.000845
Mcam	1.88303	0.001578
Mcm10	-1.48422	3e-06
Mcm2	-1.42346	1e-06
Mcm3	-1.6696	1e-06
Mcm4	-1.37469	0
Mcm5	-1.56638	5e-06
Mcm6	-1.69054	0
Mcm7	-1.38243	0
Mdk	-1.42468	0
Mdm1	-1.46963	4e-06
Megf9	-1.35102	0
Melk	-1.72859	2e-06
Mex3A	-1.5316	0
Mfng	-1.54937	0
Mfsd2	1.52325	0.003175
Mfsd3	1.37271	0.001609
Mgea5	-1.36767	2.2e-05
Mgll	1.79938	2.9e-05
Mgp	1.96688	0.029858
Mgst1	-1.8457	0.01458
Mical3	1.48045	0.000267
Micall1	1.52709	0.002286
Mif4Gd	1.38123	0
Mitf	1.66736	0.000224
Mki67	-1.61278	6e-06
Mlc1	-1.68193	0.02287
Mlf1Ip	-1.58458	1.8e-05
Mllt3	-1.35497	0.000331
Mmp14	-1.4515	1.2e-05
Mmp2	1.44265	0.028227
Mn1	-1.39501	0.000797
Mobp	1.99659	0.000631
Mphosph1	-1.6632	8e-05
Mpped2	-1.44813	0
Msi1	-1.42946	0
Msi2	-1.58621	0.000324
Msrb3	1.33017	0.024151
Mtf2	-1.42611	0
Mvd	1.73447	0.0002
Mvk	1.33982	0.000307
Mxd3	-1.43227	1.8e-05
Myo10	-1.46453	0
Myo1B	-1.70746	0
Myo1D	1.83729	0.00678
Myo6	1.35785	0.002496
Mysm1	-1.49403	1e-06
Myst4	-1.55829	0
Myt1L	-1.48121	0.007124
Nasp	-1.42181	6e-06
Ncam1	1.76765	0
Ncapd2	-1.46531	0.000193
Ncapd3	-1.40382	0.001589
Ncapg	-1.93254	2.9e-05
Ncaph	-1.43868	1.5e-05
Ndc80	-1.53163	0.000116
Ndrg1	1.94143	0.032272
Nebl	1.47457	0.000151
Nedd9	-1.66158	1e-05
Neil3	-1.65408	0.000407
Nek2	-1.67106	3e-06
Neu1	1.35813	5e-06
Neurod1	-1.79196	0.042953
Nfasc	1.60464	4.4e-05
Nfe2L3	1.67901	0.001553
Nfia	-1.48327	0
Nfib	-1.78631	0
Nfyb	-1.4854	0
Ninj1	1.65166	0.000865
Ninj2	1.75438	0.003803
Nipa1	1.71734	0.000231
Nkx2-2	1.37573	0.00309
Nkx6-2	1.88369	0.009139
Nod1	1.53907	0.00461
Nol4	-1.84127	0
Notch2	-1.65103	0.0044
Npal3	1.53656	0
Npb	1.56008	0.015123
Npc2	1.32965	0.010275
Nr1D1	1.39628	2e-05
Nr2C2	-1.56245	0
Nr3C1	1.36627	3.9e-05
Nrbp2	1.40605	0.010772
Nrxn3	-1.42139	0
Nsl1	-1.42563	0.000134
Nt5E	1.32791	0.000248
Nuf2	-1.42058	5e-06
Nusap1	-1.84538	0
Odz2	-1.34516	1.2e-05
Omg	1.67121	5.3e-05
Otud7B	1.74426	0.000917
P2Rx4	1.43577	2.9e-05
Pacs2	1.58062	0.002924
Padi2	1.83513	0.005732
Palm2	1.54384	0.001981
Paqr4	1.56518	0.000244
Paqr8	1.58954	0.004124
Parvb	1.7548	0.003074
Pax6	-1.89703	0
Pbk	-1.51249	0
Pbx1	-1.56826	0
Pcdh7	1.54086	0.000303
Pcdh9	1.40241	0.000121
Pcdhb9	1.42351	0.001981
Pcsk6	1.41752	7.4e-05
Pctk3	1.82921	0.000841
Pcyt2	1.71855	0.000811
Pde4B	1.46765	9.4e-05
Pde8A	1.85914	0.017911
Pdgfa	1.37637	0.000785
Pdk4	-1.56474	0
Pdlim2	1.95142	0.009304
Pdlim4	-1.69282	0.016073
Pdlim7	-1.40646	5e-06
Pdxk	1.47417	0.006038
Peli1	-1.46139	0.001111
Pfkp	1.51247	1e-06
Phactr3	1.52593	0
Phf16	-1.35171	0
Phip	-1.57788	4e-06
Phlda3	1.71513	0.004197
Phldb1	1.38301	0
Phyhipl	1.42887	0.000892
Pigz	1.48265	0.008932
Pim1	-1.40666	0
Pip4K2A	1.43677	0.009219
Pipox	-1.36564	0
Pla2G4A	1.87438	0.004289
Plagl1	-1.52188	0.009201
Plat	1.78317	0.001183
Plch1	-1.44812	0
Plch2	1.52801	0.002452
Pld1	1.35312	0.000185
Plekha1	1.75264	0.001319
Plekha2	1.40951	8e-05
Plekhb1	1.67119	2.4e-05
Plekhf1	1.42417	8.4e-05
Plekhg3	1.43699	0.008549
Plekhh1	1.83956	0.013671
Plk3	1.61496	0.00723
Plk4	-1.79334	4e-06
Pllp	1.60084	0
Plod1	1.63536	1.5e-05
Plp1	1.94649	0.000619
Plp2	-1.51947	0
Plxna2	-1.76115	5.2e-05
Plxnb3	1.86779	0.000365
Plxnc1	-1.62067	0.001258
Pola1	-1.66541	0.000606
Pole	-1.51897	0
Pole2	-1.43618	1e-06
Polr3E	1.48384	0.000394
Pou3F1	1.66136	2e-06
Pou3F2	-1.59816	0
Pou3F4	-1.64551	4e-06
Ppap2C	1.80474	0.001178
Ppfibp1	1.35913	0.005201
Ppic	-1.78405	0
Ppil5	-1.78395	0
Ppm2C	-1.51975	0
Ppp1R14A	1.94842	0.031693
Ppp1R16B	1.70992	0.00014
Ppt1	1.50897	0
Ppwd1	-1.51454	0
Prc1	-1.57866	2.7e-05
Prdm16	-1.91228	0.000113
Prickle1	1.7842	0.00082
Prim1	-1.56856	0
Prima1	1.54984	0.004309
Prkcq	1.47313	0
Prkcz	1.79972	0.00062
Prokr2	-1.66307	0
Prpf38B	-1.52543	0
Prps1	-1.44117	0
Prr18	1.65019	0.007265
Psip1	-1.4409	1e-06
Psmc3Ip	-1.60881	0
Psmd1	-1.34909	0
Psme4	-1.4166	2e-06
Psrc1	-1.80944	1e-06
Pten	-1.56692	0.000162
Ptgds	1.36877	0.000999
Ptpdc1	1.46847	0.001666
Ptprb	1.7317	0.002005
Ptprd	1.46256	0.0009
Ptpre	1.49883	0.000626
Ptprn	1.47335	0.032578
Ptpro	1.34348	0.001645
Qser1	-1.37503	3e-06
Rab21	1.39208	0.002962
Rab33A	1.49249	0.000655
Rab4A	1.31924	0.000303
Racgap1	-1.60603	3e-06
Rad18	-1.35976	0.001189
Rad23B	-1.55029	9e-06
Rad51	-1.60957	0
Rad51Ap1	-1.77258	0
Rai14	-1.83477	8.3e-05
Ralgds	1.47693	0.001222
Rap1A	1.5922	0.002225
Rap1Gap	1.51661	0.000531
Rap1Gds1	1.47391	0.000135
Rap2A	1.37856	2.4e-05
Rapgef4	1.70429	0.002863
Rapgef5	1.57012	0.004505
Rapgef6	-1.48502	1e-06
Rassf8	1.52392	0.001474
Rbks	1.35797	0.005505
Rbl1	-1.62272	0
Rbm25	-1.35337	2e-06
Rbm39	-1.43605	0
Rbm4	-1.35928	2.7e-05
Rbm5	-1.59732	0
Rbms3	-1.44006	4e-06
Rbmx	-1.5332	1e-05
Rbp1	-1.41521	0.000718
Rc3H2	-1.56082	1e-06
Rcan2	1.65761	0.001094
Rcbtb2	-1.37219	0
Reep5	1.6345	5.7e-05
Rfc3	-1.55138	0
Rfc4	-1.54041	4e-06
Rgs8	-1.40221	1.2e-05
Rhog	1.75641	0.003299
Rhou	1.56889	0.01926
Rhpn2	1.5514	0.035315
Rif1	-1.5299	3.1e-05
Rims2	1.52703	0.000624
Rlbp1L1	-1.42034	0.029559
Rnasel	-1.8111	2e-05
Rnd3	-1.90895	0
Rnf128	1.71521	0.013366
Rnf13	1.56337	0.011363
Rnpepl1	1.38582	0
Rorb	-1.4078	2.2e-05
Rpa2	-1.44014	1e-06
Rps6Kb1	-1.36915	1.9e-05
Rras	1.41626	0.002798
Rras2	1.69732	0.003305
Rrbp1	1.38288	0
Rrm1	-1.39739	0
Rrm2	-1.74146	0
Rsrc2	-1.31955	0.000965
Rtkn	1.72533	0.000205
S100B	1.84874	6e-06
Sall3	-1.52432	5e-06
Saps3	-1.3464	6.3e-05
Sart3	-1.52544	0.000389
Satb2	-1.36743	0.009896
Sbf2	-1.36084	1e-06
Scamp4	1.34673	2.6e-05
Scarb2	1.46667	0.001086
Sccpdh	1.36993	0.004179
Scmh1	-1.58172	1e-06
Sema3C	-1.87878	0.036466
Sema3D	1.78816	2.3e-05
Sema3E	1.65031	0.001271
Sema4A	1.65436	0.000684
Sema4D	1.6911	0.001069
Sema4F	1.41525	0.000501
Sema5A	1.59314	4e-06
Sema6A	1.62428	0.000234
Senp6	-1.41593	0.002016
Sept04	1.95244	0.002267
Sept07	1.45695	0.00171
Sept08	1.77441	0.00145
Sept11	-1.36509	0
Sertad4	-1.58027	1e-06
Sez6L	1.53946	0.000307
Sez6L2	1.51514	0.017313
Sf3B3	-1.33531	3e-06
Sfrp1	-1.62772	0.014317
Sfrs10	-1.62416	5e-06
Sfrs3	-1.52374	0
Sft2D3	1.40659	8.9e-05
Sftpc	1.35814	0.003564
Sgk2	1.90569	0.001608
Sgol1	-1.72969	2e-06
Sgol2	-1.71321	3e-06
Sh3Gl2	1.31542	0
Sh3Gl3	1.38146	0.000221
Sh3Glb2	1.3267	8e-06
Sh3Px3	1.35673	0.005198
Shcbp1	-1.72713	1e-06
Shroom2	1.44361	0.000227
Si	1.36674	0.00526
Sirt2	1.7286	2.6e-05
Skp2	-1.68084	0
Slain1	1.38717	0.012573
Slbp	-1.51017	0.000581
Slc12A2	1.32102	0.004207
Slc12A4	1.37587	1e-06
Slc12A7	-1.64251	0
Slc16A7	1.37341	6e-06
Slc17A6	-1.76555	0.045234
Slc1A1	1.66833	0.001211
Slc22A17	1.3854	5e-06
Slc24A2	1.9033	0.007328
Slc25A1	1.43707	0.000986
Slc25A38	1.46264	0.003053
Slc27A4	1.43269	0
Slc29A3	1.41099	0.000424
Slc2A1	1.40511	0.003882
Slc30A10	-1.46552	0.005989
Slc35A2	1.78565	9.7e-05
Slc35A5	1.4437	0.000193
Slc35B2	1.42386	0
Slc38A1	-1.38672	0
Slc43A1	-1.45386	0
Slc44A1	1.78892	5.8e-05
Slc45A3	1.8844	0.025128
Slc4A2	1.60565	0.005969
Slc4A7	-1.58736	1e-06
Slc6A9	1.52041	0.001814
Slc7A3	1.43042	0.036564
Slc9A3R2	1.61368	0.007617
Slc9A9	1.52395	0
Slco1C1	-1.86549	0.04833
Slco3A1	1.75025	0.042017
Slco5A1	-1.4019	0
Smad7	1.46311	0.001359
Smarcc1	-1.39585	9e-06
Smc2	-1.7675	1e-06
Smc4	-1.82677	1e-06
Smc6	-1.52002	0
Smurf1	1.46317	0.000516
Sncaip	-1.66673	0
Snora65	-1.35623	0
Snord22	-1.41322	0
Snx15	1.50896	0.000957
Socs2	-1.35994	0.001502
Sox10	1.41475	5.4e-05
Sox11	-1.8578	0
Sp4	-1.45094	1e-06
Sp8	-1.94427	4.7e-05
Spag5	-1.74074	3e-06
Spc24	-1.52013	0
Spc25	-1.68409	0
Spin1	-1.37412	0
Spns1	1.35286	0
Spp1	-1.79524	0.044627
Spred2	-1.57406	2e-06
Spsb1	1.41406	3.3e-05
Srd5A1	1.59196	0.016876
Srpk3	1.73391	0.001087
Srrm1	-1.36608	1.2e-05
Srrm2	-1.70104	1.2e-05
Ssbp2	-1.38156	0.00011
Ssbp3	-1.3885	2.9e-05
Sspn	1.57865	0.000639
Sstr2	-1.5487	0.044059
St8Sia2	-1.80174	3e-06
St8Sia3	1.35886	2e-06
St8Sia4	-1.68837	0
Stag1	-1.32518	0
Stard13	1.37164	0
Steap1	1.47327	0.00182
Stil	-1.82211	8.4e-05
Stk39	1.61985	0.000625
Stmn2	-1.8963	0
Strn	1.40771	0.001565
Strn3	-1.32349	6e-06
Stx2	1.57832	0.000202
Sulf2	1.40405	0.024281
Supt16H	-1.60422	0.000133
Susd4	1.38574	0.004484
Susd5	1.81083	0.010145
Suv39H2	-1.52669	1.2e-05
Suz12	-1.55054	0
Sv2A	1.64112	0.000325
Syce2	-1.58698	0
Syne2	-1.49067	1.1e-05
Syngr2	1.57731	0.00034
Synj2	1.5017	0.028426
Sytl2	1.92943	0.003328
Tac1	1.32665	0.034581
Tacc3	-1.49678	2e-06
Taf15	-1.69965	1e-06
Taf5	-1.43994	0
Taf9B	1.42763	0
Tcf19	-1.60653	2e-06
Tcf4	-1.43657	0.000126
Tcf7L2	1.39385	0.004198
Tcta	1.48169	0.000161
Tdrd7	1.33559	0.00049
Tfb1M	-1.40252	0
Tgfa	1.43803	0
Tgif2	-1.50256	0
Tgm2	1.36961	0.019268
Thbs3	1.51027	0.02172
Thrap3	-1.49427	2e-06
Thsd7B	1.34861	0.017558
Tiam2	-1.95745	1e-06
Timeless	-1.63756	0
Timp2	1.36051	0.000471
Tk1	-1.58696	0
Tle1	-1.3808	1e-06
Tlk2	-1.56166	1e-06
Tm7Sf2	1.42239	0.000243
Tmbim1	1.87319	0.001728
Tmcc2	1.58986	0.000681
Tmcc3	1.4974	0.000152
Tmeff2	1.87697	0.000337
Tmem10	1.96566	0.009675
Tmem112	1.60746	5e-06
Tmem117	1.75504	0.007799
Tmem120B	1.37633	0.002729
Tmem125	1.97256	0.001842
Tmem141	1.89039	0.000703
Tmem159	1.80581	0.000822
Tmem163	1.77458	0.00023
Tmem16D	1.77712	0.001073
Tmem176A	1.38268	0.025188
Tmem182	1.77158	0.001951
Tmem189	1.66261	0.000752
Tmem19	1.49999	0.001974
Tmem30A	1.3931	0
Tmem40	1.63348	0.002168
Tmem47	-1.37778	0.011031
Tmem49	1.41368	0.004435
Tmem57	-1.52754	0
Tmem58	1.55645	0.000355
Tmem63A	1.82555	0.008421
Tmem77	1.34045	0.000436
Tmod1	1.5611	0.03
Tmod2	1.60128	0.000996
Tmpo	-1.56132	0
Tmsb10	-1.54846	0
Tmtc4	-1.71232	0
Tnc	-1.85242	0.044581
Tnni1	1.86432	0.003852
Top2A	-1.72175	0
Tox3	-1.43685	1e-06
Tpd52	1.70843	0.001125
Tpp2	-1.41898	1e-06
Tppp	1.95308	0.000615
Tppp3	1.8936	0.018062
Tpx2	-1.59994	7e-06
Trim24	-1.3627	1e-06
Trip13	-1.7349	0
Trpc2	-1.44942	0.000211
Tsc22D4	1.49063	6.7e-05
Tspan15	1.61987	0.002088
Tspan17	1.86082	0.001534
Tspan2	1.96501	0.00088
Ttc28	-1.43349	0.005098
Ttc3	-1.48552	0
Ttk	-1.76385	2e-06
Ttyh2	1.454	0.002731
Tubb3	-1.51142	0
Tubb4	1.65612	0.000481
Txndc16	1.34935	6e-06
Tyms	-1.61447	0
Tyro3	1.56689	0.003859
Ube2C	-1.5829	0
Ube2I	-1.42849	0
Ube2T	-1.39159	0
Uhrf1	-1.64896	0
Unc13C	1.76217	5e-06
Unc5B	1.82349	0.007145
Unc5D	-1.82228	0.034735
Ung	-1.68538	0
Usp1	-1.53772	0
Usp37	-1.44182	0
Utx	-1.50779	1.2e-05
Vash2	-1.45477	0
Veph1	-1.6808	0.042833
Vil2	-1.94255	2e-06
Vim	-1.86109	2.3e-05
Vit	-1.58817	0.005026
Vldlr	1.67969	0
Vnn1	-1.72043	0.047243
Vps37A	1.3198	0.005358
Vsnl1	1.49219	0.023516
Vwc2	1.33426	0.032018
Wac	-1.43968	1e-06
Wdfy1	1.3996	0.001148
Wdhd1	-1.36566	0.000117
Wdr68	1.38379	0.001772
Wdr91	1.3212	0.002917
Wdsub1	1.55443	0.000129
Wee1	-1.57191	0
Whsc1L1	-1.42867	2.2e-05
Wipf1	1.37995	0
Wnt4	1.45837	0.033247
Wwtr1	-1.60484	0.014075
Xrcc3	1.42134	0.014576
Xrn2	-1.42334	0
Ypel2	1.70781	0.012778
Zbtb12	-1.42279	0
Zbtb20	-1.48031	0
Zc3H15	-1.49375	1e-06
Zdhhc14	1.68894	0
Zdhhc9	1.65505	0.003194
Zfhx4	-1.34527	0.018324
Zfpm1	1.46881	5e-06
Zfyve20	-1.39194	0.001876
Zic1	-1.90957	0
Zic3	-1.8435	0
Zik1	-1.5917	0
Zwilch	-1.3553	1.4e-05
